# Supplementary material for: Outcomes for surgical procedures funded by the English health service but carried out in public versus independent hospitals: a database study
Source: PubMed Central journal article supplement (PMC9234423; doi:10.1136/bmjqs-2021-013522), 2021-09-07

## SUPPLEMENTARY FIGURES

**Supplementary Figure 1: Flow chart showing the data extraction and cleaning process for the selected operation types.**

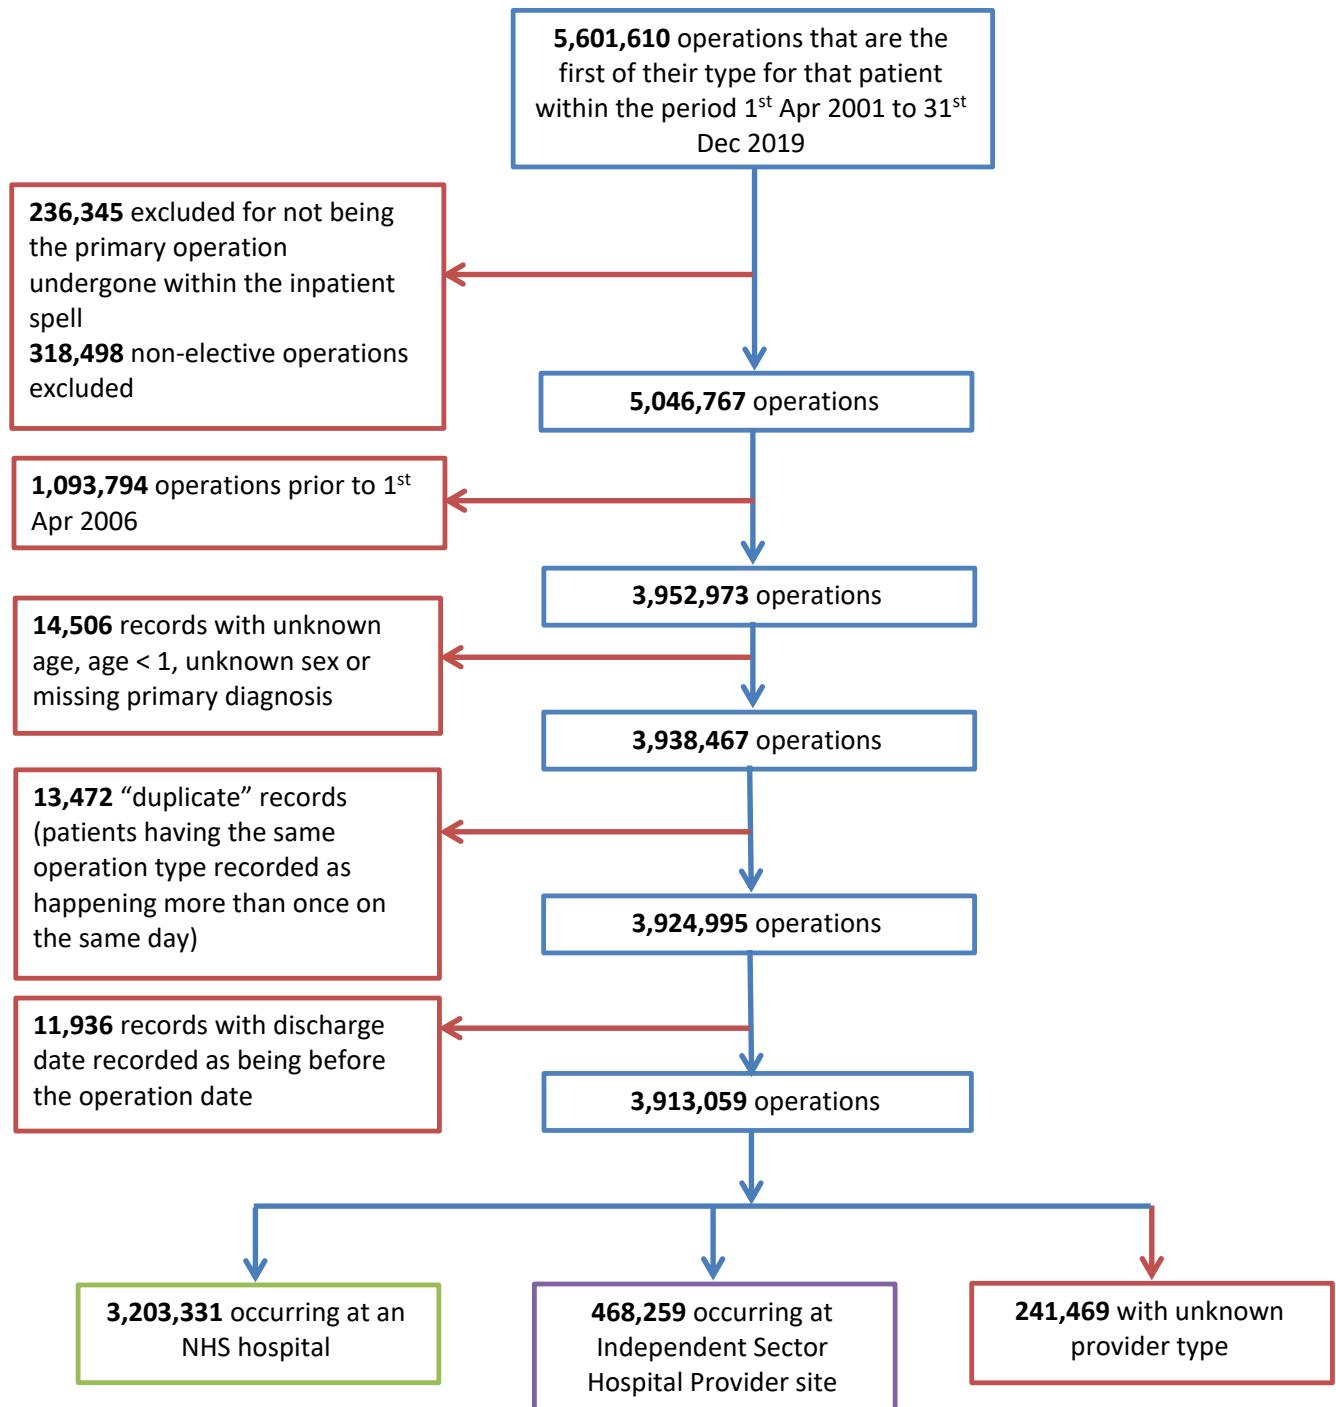

Supplement: bmjqs-2021-013522supp004.pdf [file bmjqs-2021-013522supp004.pdf]
