# Supplementary material for: Outcomes for surgical procedures funded by the English health service but carried out in public versus independent hospitals: a database study
Source: PubMed Central journal article supplement (PMC9234423; doi:10.1136/bmjqs-2021-013522), 2021-09-07
Supplement: bmjqs-2021-013522supp005.pdf [file bmjqs-2021-013522supp005.pdf]

**Supplementary Table 3: Operation specialties for selected operations**

| OPCS4 code  | Description                                                                            | Specialty*                                                                          |
|-------------|----------------------------------------------------------------------------------------|-------------------------------------------------------------------------------------|
| <b>F091</b> | Surgical removal of impacted wisdom tooth                                              | Oral Surgery, Maxillo-Facial Surgery                                                |
| <b>F093</b> | Surgical removal of wisdom tooth NEC                                                   | Oral Surgery, Maxillo-Facial Surgery                                                |
| <b>J183</b> | Total cholecystectomy NEC                                                              | Hepatobiliary & Pancreatic Surgery, Upper Gastrointestinal Surgery, General Surgery |
| <b>M653</b> | Endoscopic resection of prostate NEC                                                   | Urology                                                                             |
| <b>Q074</b> | Total abdominal hysterectomy NEC                                                       | Gynaecology                                                                         |
| <b>T212</b> | Repair of recurrent inguinal hernia using insert of prosthetic material                | General Surgery                                                                     |
| <b>T242</b> | Repair of umbilical hernia using insert of prosthetic material                         | General Surgery                                                                     |
| <b>T243</b> | Repair of umbilical hernia using sutures                                               | General Surgery                                                                     |
| <b>T272</b> | Repair of ventral hernia using insert of prosthetic material                           | General Surgery                                                                     |
| <b>V255</b> | Primary posterior decompression of lumbar spinal cord NEC                              | Spinal Surgery Service, Trauma & Orthopaedics, Neurosurgery                         |
| <b>W371</b> | Primary total prosthetic replacement of hip joint using cement                         | General Surgery, Trauma & Orthopaedics                                              |
| <b>W381</b> | Primary total prosthetic replacement of hip joint not using cement                     | Trauma & Orthopaedics                                                               |
| <b>W391</b> | Primary total prosthetic replacement of hip joint NEC                                  | Trauma & Orthopaedics                                                               |
| <b>W401</b> | Primary total prosthetic replacement of knee joint using cement                        | Trauma & Orthopaedics                                                               |
| <b>W411</b> | Primary total prosthetic replacement of knee joint not using cement                    | Trauma & Orthopaedics                                                               |
| <b>W421</b> | Primary total prosthetic replacement of knee joint NEC                                 | Trauma & Orthopaedics                                                               |
| <b>W931</b> | Primary hybrid prosthetic replacement of hip joint using cemented acetabular component | Trauma & Orthopaedics                                                               |
| <b>W941</b> | Primary hybrid prosthetic replacement of hip joint using cemented femoral component    | Trauma & Orthopaedics                                                               |

\*List of specialties comprises all those with > 1000 admissions and >1% of admissions when considering index admissions for this operation type. The specialty used was that within which the consultant was working during the period of care.
