# Supplementary material for: Outcomes for surgical procedures funded by the English health service but carried out in public versus independent hospitals: a database study
Source: PubMed Central journal article supplement (PMC9234423; doi:10.1136/bmjqs-2021-013522), 2021-09-07
Supplement: bmjqs-2021-013522supp006.pdf [file bmjqs-2021-013522supp006.pdf]

**Supplementary Table 4: List of ISHPs conducting at least 10 of the selected operations**

**during the study period.** Note that if a hospital changed ownership during the study period it may appear more than once in the table. Note also that not all hospitals listed here were operating as ISHPs during the whole study period. ISHPs are classified as for profit or not-for-profit.

| Organisation name and code                            | Number of ops in data set | Profit/non-profit | Owner         |
|-------------------------------------------------------|---------------------------|-------------------|---------------|
| NXM01 - THE HORDER CENTRE - ST JOHNS ROAD             | 10,000 - 19,999           | NON-PROFIT        | Other         |
| NTP11 - SOUTHAMPTON NHS TREATMENT CENTRE              | 10,000 - 19,999           | PROFIT            | Practice Plus |
| NVC20 - THE YORKSHIRE CLINIC                          | 5,000 - 9,999             | PROFIT            | Ramsay        |
| NVC06 - FITZWILLIAM HOSPITAL                          | 5,000 - 9,999             | PROFIT            | Ramsay        |
| NTP13 - BARLBOROUGH NHS TREATMENT CENTRE              | 5,000 - 9,999             | PROFIT            | Practice Plus |
| NTP15 - NORTH EAST LONDON TREATMENT CENTRE CARE UK    | 5,000 - 9,999             | PROFIT            | Practice Plus |
| NVC40 - WOODTHORPE HOSPITAL                           | 5,000 - 9,999             | PROFIT            | Ramsay        |
| NVC23 - WOODLAND HOSPITAL                             | 5,000 - 9,999             | PROFIT            | Ramsay        |
| NT351 - SPIRE HULL AND EAST RIDING HOSPITAL           | 5,000 - 9,999             | PROFIT            | Spire         |
| NVC18 - SPRINGFIELD HOSPITAL                          | 5,000 - 9,999             | PROFIT            | Ramsay        |
| NVC04 - DUCHY HOSPITAL                                | 5,000 - 9,999             | PROFIT            | Ramsay        |
| NVC25 - HORTON NHS TREATMENT CENTRE                   | 5,000 - 9,999             | PROFIT            | Ramsay        |
| NVC07 - FULWOOD HALL HOSPITAL                         | 5,000 - 9,999             | PROFIT            | Ramsay        |
| NVC28 - CLIFTON PARK HOSPITAL                         | 5,000 - 9,999             | PROFIT            | Ramsay        |
| NT333 - SPIRE WASHINGTON HOSPITAL                     | 5,000 - 9,999             | PROFIT            | Spire         |
| NVC19 - RIVERS HOSPITAL                               | 5,000 - 9,999             | PROFIT            | Ramsay        |
| NT318 - SPIRE NORWICH HOSPITAL                        | 5,000 - 9,999             | PROFIT            | Spire         |
| NTPH2 - EMERSONS GREEN NHS TREATMENT CENTRE           | 5,000 - 9,999             | PROFIT            | Practice Plus |
| NT401 - BMI - THE ALEXANDRA HOSPITAL                  | 5,000 - 9,999             | PROFIT            | BMI           |
| NT225 - NUFFIELD HEALTH, LEEDS HOSPITAL               | 5,000 - 9,999             | NON-PROFIT        | Nuffield      |
| NWF01 - BENENDEN HOSPITAL                             | 2,000 - 4,999             | NON-PROFIT        | Other         |
| NT226 - NUFFIELD HEALTH, LEICESTER HOSPITAL           | 2,000 - 4,999             | NON-PROFIT        | Nuffield      |
| NTE02 - ST HUGH'S HOSPITAL                            | 2,000 - 4,999             | NON-PROFIT        | Other         |
| NT213 - NUFFIELD HEALTH, DERBY HOSPITAL               | 2,000 - 4,999             | NON-PROFIT        | Nuffield      |
| NT237 - NUFFIELD HEALTH, TEES HOSPITAL                | 2,000 - 4,999             | NON-PROFIT        | Nuffield      |
| NT233 - NUFFIELD HEALTH, PLYMOUTH HOSPITAL            | 2,000 - 4,999             | NON-PROFIT        | Nuffield      |
| NT230 - NUFFIELD HEALTH, NORTH STAFFORDSHIRE HOSPITAL | 2,000 - 4,999             | NON-PROFIT        | Nuffield      |
| NV313 - CIRCLE - NOTTINGHAM NHS TREATMENT CENTRE      | 2,000 - 4,999             | PROFIT            | Circle        |
| NVC13 - OAKS HOSPITAL                                 | 2,000 - 4,999             | PROFIT            | Ramsay        |
| NVC05 - EUXTON HALL HOSPITAL                          | 2,000 - 4,999             | PROFIT            | Ramsay        |
| NVC08 - MOUNT STUART HOSPITAL                         | 2,000 - 4,999             | PROFIT            | Ramsay        |
| NT350 - SPIRE METHLEY PARK HOSPITAL                   | 2,000 - 4,999             | PROFIT            | Spire         |
| NVC12 - OAKLANDS HOSPITAL                             | 2,000 - 4,999             | PROFIT            | Ramsay        |
| NT420 - BMI - THE HIGHFIELD HOSPITAL                  | 2,000 - 4,999             | PROFIT            | BMI           |
| NT457 - BMI WOODLANDS HOSPITAL                        | 2,000 - 4,999             | PROFIT            | BMI           |
| NVC09 - NEW HALL HOSPITAL                             | 2,000 - 4,999             | PROFIT            | Ramsay        |
| NVC21 - WEST MIDLANDS HOSPITAL                        | 2,000 - 4,999             | PROFIT            | Ramsay        |
| NV302 - CIRCLE BATH HOSPITAL                          | 2,000 - 4,999             | PROFIT            | Circle        |
| NT348 - SPIRE ELLAND HOSPITAL                         | 2,000 - 4,999             | PROFIT            | Spire         |
| NT337 - SPIRE LIVERPOOL HOSPITAL                      | 2,000 - 4,999             | PROFIT            | Spire         |
| NT417 - BMI - GORING HALL HOSPITAL                    | 2,000 - 4,999             | PROFIT            | BMI           |

|                                                        |               |            |                           |
|--------------------------------------------------------|---------------|------------|---------------------------|
| NVC22 - WINFIELD HOSPITAL                              | 2,000 - 4,999 | PROFIT     | Ramsay                    |
| NVC15 - PINEHILL HOSPITAL                              | 2,000 - 4,999 | PROFIT     | Ramsay                    |
| NT441 - BMI - THREE SHIRES HOSPITAL                    | 2,000 - 4,999 | PROFIT     | BMI                       |
| NT332 - SPIRE LEEDS HOSPITAL                           | 2,000 - 4,999 | PROFIT     | Spire                     |
| NT321 - SPIRE LITTLE ASTON HOSPITAL                    | 2,000 - 4,999 | PROFIT     | Spire                     |
| NVC16 - RENACRES HOSPITAL                              | 2,000 - 4,999 | PROFIT     | Ramsay                    |
| NT347 - SPIRE FYLDE COAST HOSPITAL                     | 2,000 - 4,999 | PROFIT     | Spire                     |
| NT313 - SPIRE WELLESLEY HOSPITAL                       | 2,000 - 4,999 | PROFIT     | Spire                     |
| NT322 - SPIRE LEICESTER HOSPITAL                       | 2,000 - 4,999 | PROFIT     | Spire                     |
| NT324 - SPIRE CHESHIRE HOSPITAL                        | 2,000 - 4,999 | PROFIT     | Spire                     |
| NT320 - SPIRE PARKWAY HOSPITAL                         | 2,000 - 4,999 | PROFIT     | Spire                     |
| NVC17 - ROWLEY HALL HOSPITAL                           | 2,000 - 4,999 | PROFIT     | Ramsay                    |
| NT305 - SPIRE PORTSMOUTH HOSPITAL                      | 2,000 - 4,999 | PROFIT     | Spire                     |
| NT424 - BMI - THE MERIDEN HOSPITAL                     | 2,000 - 4,999 | PROFIT     | BMI                       |
| NT304 - SPIRE SOUTHAMPTON HOSPITAL                     | 2,000 - 4,999 | PROFIT     | Spire                     |
| NT301 - SPIRE SOUTH BANK HOSPITAL                      | 2,000 - 4,999 | PROFIT     | Spire                     |
| NTC01 - SHEPTON MALLETT NHS TREATMENT CENTRE           | 2,000 - 4,999 | PROFIT     | UK Specialist hospitals   |
| NT402 - BMI - BATH CLINIC                              | 2,000 - 4,999 | PROFIT     | BMI                       |
| NT412 - BMI - THE DROITWICH SPA HOSPITAL               | 2,000 - 4,999 | PROFIT     | BMI                       |
| NT448 - BMI THE HUDDERSFIELD HOSPITAL                  | 2,000 - 4,999 | PROFIT     | BMI                       |
| NT430 - BMI - THE RIDGEWAY HOSPITAL                    | 2,000 - 4,999 | PROFIT     | BMI                       |
| NTPH1 - SHEPTON MALLETT NHS TREATMENT CENTRE           | 2,000 - 4,999 | PROFIT     | Practice Plus             |
| NT312 - SPIRE ALEXANDRA HOSPITAL                       | 2,000 - 4,999 | PROFIT     | Spire                     |
| NTD02 - THE CHESHIRE & MERSEYSIDE NHS TREATMENT CENTRE | 2,000 - 4,999 | PROFIT     | Interhealth care services |
| NT422 - BMI - THE LONDON INDEPENDENT HOSPITAL          | 2,000 - 4,999 | PROFIT     | BMI                       |
| NT432 - BMI - THE SANDRINGHAM HOSPITAL                 | 2,000 - 4,999 | PROFIT     | BMI                       |
| NVC11 - NORTH DOWNS HOSPITAL                           | 2,000 - 4,999 | PROFIT     | Ramsay                    |
| NV323 - CIRCLE READING HOSPITAL                        | 2,000 - 4,999 | PROFIT     | Circle                    |
| NVG01 - FAIRFIELD HOSPITAL                             | 2,000 - 4,999 | PROFIT     | Ramsay                    |
| NT325 - SPIRE MURRAYFIELD HOSPITAL                     | 2,000 - 4,999 | PROFIT     | Spire                     |
| NT427 - BMI - THE PARK HOSPITAL                        | 2,000 - 4,999 | PROFIT     | BMI                       |
| NT302 - SPIRE BRISTOL HOSPITAL                         | 2,000 - 4,999 | PROFIT     | Spire                     |
| NTP17 - SUSSEX ORTHOPAEDIC NHS TREATMENT CENTRE        | 2,000 - 4,999 | PROFIT     | Practice Plus             |
| NT410 - BMI - THE CHILTERN HOSPITAL                    | 2,000 - 4,999 | PROFIT     | BMI                       |
| NT450 - BMI THE LINCOLN HOSPITAL                       | 2,000 - 4,999 | PROFIT     | BMI                       |
| NVC02 - THE BERKSHIRE INDEPENDENT HOSPITAL             | 2,000 - 4,999 | PROFIT     | Ramsay                    |
| NT308 - SPIRE GATWICK PARK HOSPITAL                    | 2,000 - 4,999 | PROFIT     | Spire                     |
| NT316 - SPIRE HARPENDEN HOSPITAL                       | 2,000 - 4,999 | PROFIT     | Spire                     |
| NT411 - BMI - THE CLEMENTINE CHURCHILL HOSPITAL        | 2,000 - 4,999 | PROFIT     | BMI                       |
| NT418 - BMI - THE HAMPSHIRE CLINIC                     | 2,000 - 4,999 | PROFIT     | BMI                       |
| NT314 - SPIRE LONDON EAST                              | 2,000 - 4,999 | PROFIT     | Spire                     |
| NT364 - SPIRE MONTEFIORE HOSPITAL                      | 2,000 - 4,999 | PROFIT     | Spire                     |
| NT403 - BMI - THE BEARDWOOD HOSPITAL                   | 2,000 - 4,999 | PROFIT     | BMI                       |
| NT446 - BMI ST EDMUNDS HOSPITAL                        | 2,000 - 4,999 | PROFIT     | BMI                       |
| NT222 - NUFFIELD HEALTH, IPSWICH HOSPITAL              | 1,000 - 1,999 | NON-PROFIT | Nuffield                  |
| NT209 - NUFFIELD HEALTH, CAMBRIDGE HOSPITAL            | 1,000 - 1,999 | NON-PROFIT | Nuffield                  |
| NT212 - NUFFIELD HEALTH, CHICHESTER HOSPITAL           | 1,000 - 1,999 | NON-PROFIT | Nuffield                  |
| NTE03 - CLAREMONT HOSPITAL                             | 1,000 - 1,999 | NON-PROFIT | Other                     |

|                                                              |               |            |                       |
|--------------------------------------------------------------|---------------|------------|-----------------------|
| NT210 - NUFFIELD HEALTH, THE GROSVENOR HOSPITAL, CHESTER     | 1,000 - 1,999 | NON-PROFIT | Nuffield              |
| NT229 - NUFFIELD HEALTH, NEWCASTLE UPON TYNE HOSPITAL        | 1,000 - 1,999 | NON-PROFIT | Nuffield              |
| NT219 - NUFFIELD HEALTH, HEREFORD HOSPITAL                   | 1,000 - 1,999 | NON-PROFIT | Nuffield              |
| NT215 - NUFFIELD HEALTH, EXETER HOSPITAL                     | 1,000 - 1,999 | NON-PROFIT | Nuffield              |
| NT242 - NUFFIELD HEALTH, WOLVERHAMPTON HOSPITAL              | 1,000 - 1,999 | NON-PROFIT | Nuffield              |
| NT238 - NUFFIELD HEALTH, TAUNTON HOSPITAL                    | 1,000 - 1,999 | NON-PROFIT | Nuffield              |
| NT204 - NUFFIELD HEALTH, BRENTWOOD HOSPITAL                  | 1,000 - 1,999 | NON-PROFIT | Nuffield              |
| NT245 - NUFFIELD HEALTH, YORK HOSPITAL                       | 1,000 - 1,999 | NON-PROFIT | Nuffield              |
| NT214 - NUFFIELD HEALTH, WESSEX HOSPITAL                     | 1,000 - 1,999 | NON-PROFIT | Nuffield              |
| NT404 - BMI - THE BEAUMONT HOSPITAL                          | 1,000 - 1,999 | PROFIT     | BMI                   |
| NT339 - SPIRE REGENCY HOSPITAL                               | 1,000 - 1,999 | PROFIT     | Spire                 |
| NVC44 - THE WESTBOURNE CENTRE                                | 1,000 - 1,999 | PROFIT     | Ramsay                |
| NVC01 - ASHTEAD HOSPITAL                                     | 1,000 - 1,999 | PROFIT     | Ramsay                |
| NT443 - BMI - THE WINTERBOURNE HOSPITAL                      | 1,000 - 1,999 | PROFIT     | BMI                   |
|                                                              |               |            | Aspen                 |
| NYW01 - ASPEN - THE HOLLY                                    | 1,000 - 1,999 | PROFIT     | healthcare            |
| NVC35 - TEES VALLEY TREATMENT CENTRE                         | 1,000 - 1,999 | PROFIT     | Ramsay                |
| NT327 - SPIRE MANCHESTER HOSPITAL                            | 1,000 - 1,999 | PROFIT     | Spire                 |
| ADP02 - KIMS HOSPITAL (NEWNHAM COURT)                        | 1,000 - 1,999 | PROFIT     | KIMS                  |
| NTPH3 - DEVIZES NHS TREATMENT CENTRE                         | 1,000 - 1,999 | PROFIT     | Practice Plus         |
| NT317 - SPIRE CAMBRIDGE LEA HOSPITAL                         | 1,000 - 1,999 | PROFIT     | Spire                 |
| NT439 - BMI - THE SOUTH CHESHIRE PRIVATE HOSPITAL            | 1,000 - 1,999 | PROFIT     | BMI                   |
| NT309 - SPIRE SUSSEX HOSPITAL                                | 1,000 - 1,999 | PROFIT     | Spire                 |
| NT346 - SPIRE ST SAVIOURS HOSPITAL                           | 1,000 - 1,999 | PROFIT     | Spire                 |
| NT451 - BMI THE CAVELL HOSPITAL                              | 1,000 - 1,999 | PROFIT     | BMI                   |
| NVC24 - BODMIN NHS TREATMENT CENTRE                          | 1,000 - 1,999 | PROFIT     | Ramsay                |
| NVC14 - PARK HILL HOSPITAL                                   | 1,000 - 1,999 | PROFIT     | Ramsay                |
| NTA04 - NOTTINGHAM NHS TREATMENT CENTRE (NATIONS HEALTHCARE) | 1,000 - 1,999 | PROFIT     | Nations<br>healthcare |
| NT604 - SUSSEX ORTHOPAEDIC NHS TREATMENT CENTRE              | 1,000 - 1,999 | PROFIT     | Care UK               |
| NT319 - SPIRE HARTSWOOD HOSPITAL                             | 1,000 - 1,999 | PROFIT     | Spire                 |
| NT445 - BMI THE EDGBASTON HOSPITAL                           | 1,000 - 1,999 | PROFIT     | BMI                   |
| NT440 - BMI - THORNBURY HOSPITAL                             | 1,000 - 1,999 | PROFIT     | BMI                   |
| NTX01 - ONE HEALTH GROUP LTD                                 | 1,000 - 1,999 | PROFIT     | One Health            |
| NTPH5 - PENINSULA NHS TREATMENT CENTRE                       | 1,000 - 1,999 | PROFIT     | Practice Plus         |
| NT344 - SPIRE DUNEDIN HOSPITAL                               | 1,000 - 1,999 | PROFIT     | Spire                 |
| NVC34 - FYLDE COAST NHS TREATMENT CENTRE                     | 1,000 - 1,999 | PROFIT     | Ramsay                |
| NT434 - BMI - THE SAXON CLINIC                               | 1,000 - 1,999 | PROFIT     | BMI                   |
| NT315 - SPIRE BUSHEY HOSPITAL                                | 1,000 - 1,999 | PROFIT     | Spire                 |
| NT497 - BMI GISBURNE PARK HOSPITAL                           | 1,000 - 1,999 | PROFIT     | BMI                   |
| NT436 - BMI - SHIRLEY OAKS HOSPITAL                          | 1,000 - 1,999 | PROFIT     | BMI                   |
| NVC33 - GISBURNE PARK NHS TREATMENT CENTRE                   | 1,000 - 1,999 | PROFIT     | Ramsay                |
| NT449 - BMI THE LANCASTER HOSPITAL                           | 1,000 - 1,999 | PROFIT     | BMI                   |
| NT408 - BMI - THE CHAUCER HOSPITAL                           | 1,000 - 1,999 | PROFIT     | BMI                   |
|                                                              |               |            | Aspen                 |
| NYW04 - ASPEN - CLAREMONT HOSPITAL                           | 1,000 - 1,999 | PROFIT     | healthcare            |
| NT447 - BMI THE DUCHY HOSPITAL                               | 1,000 - 1,999 | PROFIT     | BMI                   |
| NTX11 - ONE HEALTH GROUP CLINIC - THORNBURY                  | 1,000 - 1,999 | PROFIT     | One Health            |
| NT413 - BMI - THE ESPERANCE HOSPITAL                         | 1,000 - 1,999 | PROFIT     | BMI                   |

|                                                          |               |            |                          |
|----------------------------------------------------------|---------------|------------|--------------------------|
| NT714 - GREATER MANCHESTER SURGICAL CENTRE               | 1,000 - 1,999 | PROFIT     | Netcare                  |
| NT438 - BMI - THE SOMERFIELD HOSPITAL                    | 1,000 - 1,999 | PROFIT     | BMI                      |
| NT345 - SPIRE CLARE PARK HOSPITAL                        | 1,000 - 1,999 | PROFIT     | Spire                    |
| NT433 - BMI - SARUM ROAD HOSPITAL                        | 1,000 - 1,999 | PROFIT     | BMI                      |
| NT206 - NUFFIELD HEALTH, BRISTOL HOSPITAL (CHESTERFIELD) | 500 - 999     | NON-PROFIT | Nuffield                 |
| NT235 - NUFFIELD HEALTH, SHREWSBURY HOSPITAL             | 500 - 999     | NON-PROFIT | Nuffield                 |
| NT224 - NUFFIELD HEALTH, WARWICKSHIRE HOSPITAL           | 500 - 999     | NON-PROFIT | Nuffield                 |
| NT218 - NUFFIELD HEALTH, HAYWARDS HEATH HOSPITAL         | 500 - 999     | NON-PROFIT | Nuffield                 |
| NT244 - NUFFIELD HOSPITAL OXFORD (THE MANOR)             | 500 - 999     | NON-PROFIT | Nuffield                 |
| NVCOR - TEES VALLEY HOSPITAL                             | 500 - 999     | PROFIT     | Ramsay                   |
| NT406 - BMI - THE BLACKHEATH HOSPITAL                    | 500 - 999     | PROFIT     | BMI                      |
| NT419 - BMI - THE HARBOUR HOSPITAL                       | 500 - 999     | PROFIT     | BMI                      |
| NT421 - BMI - THE KINGS OAK HOSPITAL                     | 500 - 999     | PROFIT     | BMI                      |
| NT310 - SPIRE TUNBRIDGE WELLS HOSPITAL                   | 500 - 999     | PROFIT     | Spire                    |
| NT435 - BMI - THE SHELBURNE HOSPITAL                     | 500 - 999     | PROFIT     | BMI                      |
| NT423 - BMI - THE MANOR HOSPITAL                         | 500 - 999     | PROFIT     | BMI                      |
| NT405 - BMI - BISHOPS WOOD                               | 500 - 999     | PROFIT     | BMI                      |
| NT414 - BMI - FAWKHAM MANOR HOSPITAL                     | 500 - 999     | PROFIT     | BMI                      |
| NT409 - BMI - CHELSFIELD PARK HOSPITAL                   | 500 - 999     | PROFIT     | BMI                      |
| NT429 - BMI - THE PRIORY HOSPITAL                        | 500 - 999     | PROFIT     | BMI                      |
| NTA03 - THE MIDLANDS NHS TREATMENT CENTRE                | 500 - 999     | PROFIT     | Nations healthcare       |
| NTYF1 - SPENCER PRIVATE HOSPITALS                        | 500 - 999     | PROFIT     | Other                    |
| NT431 - BMI - THE RUNNYMEDE HOSPITAL                     | 500 - 999     | PROFIT     | BMI                      |
| NVC39 - KENDAL NHS TREATMENT CENTRE                      | 500 - 999     | PROFIT     | Ramsay                   |
| NT331 - BUPA HILL AND EAST RIDING HOSPITAL               | 500 - 999     | PROFIT     | Spire                    |
| NW931 - CLINICENTA SURGICENTRE                           | 500 - 999     | PROFIT     | Clinicenta               |
| NT428 - BMI - THE PRINCESS MARGARET HOSPITAL             | 500 - 999     | PROFIT     | BMI                      |
| NTX12 - ONE HEALTH GROUP CLINIC - CLAREMONT              | 500 - 999     | PROFIT     | One Health Practice Plus |
| NTPAD - ST MARY'S NHS TREATMENT CENTRE                   | 500 - 999     | PROFIT     |                          |
| NT211 - NUFFIELD HEALTH, CHELTENHAM HOSPITAL             | 200 - 499     | NON-PROFIT | Nuffield                 |
| NXM04 - THE MCINDOE CENTRE                               | 200 - 499     | NON-PROFIT | Other                    |
| 8F926 - THE NOTTINGHAM NUFFIELD HOSPITAL                 | 200 - 499     | NON-PROFIT | Nuffield                 |
| AAH01 - TETBURY HOSPITAL TRUST                           | 200 - 499     | NON-PROFIT | Other                    |
| NT241 - NUFFIELD HEALTH, WOKING HOSPITAL                 | 200 - 499     | NON-PROFIT | Nuffield                 |
| NT205 - NUFFIELD HEALTH, BRIGHTON HOSPITAL               | 200 - 499     | NON-PROFIT | Nuffield                 |
| NT202 - NUFFIELD HEALTH, BOURNEMOUTH HOSPITAL            | 200 - 499     | NON-PROFIT | Nuffield                 |
| NT239 - NUFFIELD HEALTH, TUNBRIDGE WELLS HOSPITAL        | 200 - 499     | NON-PROFIT | Nuffield                 |
| NNQ01 - BRAINTREE COMMUNITY HOSPITAL                     | 200 - 499     | PROFIT     | Spencer                  |
| NT343 - SPIRE THAMES VALLEY HOSPITAL                     | 200 - 499     | PROFIT     | Spire                    |
| NTP16 - WILL ADAMS NHS TREATMENT CENTRE                  | 200 - 499     | PROFIT     | Practice Plus            |
| NT506 - NORTH EAST LONDON NHS TREATMENT CENTRE           | 200 - 499     | PROFIT     | Care UK                  |
| NVC10 - NEW HALL NHS TREATMENT CENTRE                    | 200 - 499     | PROFIT     | Ramsay                   |
| NVC29 - COBALT HOSPITAL                                  | 200 - 499     | PROFIT     | Ramsay                   |
| NT437 - BMI - THE SLOANE HOSPITAL                        | 200 - 499     | PROFIT     | BMI                      |

|                                                         |           |            |               |
|---------------------------------------------------------|-----------|------------|---------------|
| NTP23 - ECCLESHILL NHS TREATMENT CENTRE                 | 200 - 499 | PROFIT     | Practice Plus |
| NT349 - SPIRE LONGLANDS CONSULTING ROOMS                | 200 - 499 | PROFIT     | Spire         |
|                                                         |           |            | Aspen         |
| NYW02 - ASPEN - PARKSIDE HOSPITAL                       | 200 - 499 | PROFIT     | healthcare    |
| NT455 - BMI MOUNT ALVERNIA HOSPITAL                     | 200 - 499 | PROFIT     | BMI           |
|                                                         |           |            | Probus        |
| NAM01 - PROBUS SURGICAL CENTRE                          | 200 - 499 | PROFIT     | surgery       |
| NT30A - SPIRE NOTTINGHAM HOSPITAL                       | 200 - 499 | PROFIT     | Spire         |
| NVC31 - BLAKELANDS HOSPITAL                             | 200 - 499 | PROFIT     | Ramsay        |
| NT416 - BMI - HENDON HOSPITAL                           | 200 - 499 | PROFIT     | BMI           |
|                                                         |           |            | Aspen         |
| NYW03 - ASPEN - HIGHGATE HOSPITAL                       | 200 - 499 | PROFIT     | healthcare    |
| NT3X3 - SPIRE ST ANTHONY'S HOSPITAL                     | 200 - 499 | PROFIT     | Spire         |
| NTYE7 - THE HORDER CENTRE                               | 100 - 199 | NON-PROFIT | Other         |
|                                                         |           |            | Independent   |
| NXP04 - HATHAWAY MEDICAL CENTRE                         | 100 - 199 | PROFIT     | health group  |
|                                                         |           |            | Nations       |
| NTA01 - ECCLESHILL NHS TREATMENT CENTRE                 | 100 - 199 | PROFIT     | healthcare    |
| 8DD07 - BUPA NORTH CHESHIRE HOSPITAL                    | 100 - 199 | PROFIT     | Bupa          |
| NT415 - BMI - THE FOSCOTE HOSPITAL                      | 100 - 199 | PROFIT     | BMI           |
| NT338 - SPIRE YALE HOSPITAL                             | 100 - 199 | PROFIT     | Spire         |
| NVC27 - BOSTON WEST HOSPITAL                            | 100 - 199 | PROFIT     | Ramsay        |
| NT602 - WILL ADAMS NHS TREATMENT CENTRE                 | 100 - 199 | PROFIT     | Care UK       |
| NTPO3 - MILNROW VILLAGE PRACTICE (ICATS)                | 100 - 199 | PROFIT     | Practice Plus |
|                                                         |           |            | Classic       |
| NTH09 - HULL AND EAST RIDING HOSPITAL                   | 100 - 199 | PROFIT     | hospitals     |
| 8A643 - THE RIVERS HOSPITAL                             | 100 - 199 | PROFIT     | Other         |
|                                                         |           |            | Independent   |
| NXP17 - WHITE HORSE HEALTH CENTRE - IHG                 | 100 - 199 | PROFIT     | health group  |
| NTY48 - TETBURY HOSPITAL                                | 10 - 99   | NON-PROFIT | Other         |
| NT207 - NUFFIELD HEALTH, BRISTOL HOSPITAL (ST MARY'S)   | 10 - 99   | NON-PROFIT | Nuffield      |
| NTY57 - BENENDEN HOSPITAL                               | 10 - 99   | NON-PROFIT | Other         |
| NT221 - NUFFIELD HEALTH, HULL HOSPITAL                  | 10 - 99   | NON-PROFIT | Nuffield      |
| NTP14 - MID KENT NHS TREATMENT CENTRE                   | 10 - 99   | PROFIT     | Practice Plus |
| 8A805 - HOLLY HOUSE HOSPITAL                            | 10 - 99   | PROFIT     | Other         |
| 8AY29 - BMI THE PARK HOSPITAL                           | 10 - 99   | PROFIT     | BMI           |
| NTX51 - ONE HEALTH GROUP - BARLBOROUGH TREATMENT CENTRE | 10 - 99   | PROFIT     | One Health    |
| NT340 - BMI SOUTH CHESHIRE PRIVATE HOSPITAL (SPIRE)     | 10 - 99   | PROFIT     | Spire         |
| NTYD5 - WOODLANDS HOSPITAL                              | 10 - 99   | PROFIT     | Other         |
| NT603 - ST MARY'S NHS TREATMENT CENTRE                  | 10 - 99   | PROFIT     | Care UK       |
| NTX19 - HUDDERSFIELD HOSPITAL - THE ONE HEALTH GROUP    | 10 - 99   | PROFIT     | One Health    |
| NT808 - CAPIO NEW HALL HOSPITAL NHS TREATMENT CENTRE    | 10 - 99   | PROFIT     | Ramsay        |
| NT503 - MID KENT NHS TREATMENT CENTRE                   | 10 - 99   | PROFIT     | Care UK       |
| NED30 - ASHTEAD HOSPITAL                                | 10 - 99   | PROFIT     | EDICS         |
| NNE02 - DORKING GENERAL HOSPITAL                        | 10 - 99   | PROFIT     | Spencer       |
|                                                         |           |            | Independent   |
| NXP02 - OLD TOWN SURGERY                                | 10 - 99   | PROFIT     | health group  |
|                                                         |           |            | Classic       |
| NTH03 - ST SAVIOUR'S HOSPITAL                           | 10 - 99   | PROFIT     | hospitals     |
| NT425 - BMI - THE NUNEATON PRIVATE HOSPITAL             | 10 - 99   | PROFIT     | BMI           |

|                                                     |         |        |                          |
|-----------------------------------------------------|---------|--------|--------------------------|
| NTH06 - ELLAND HOSPITAL                             | 10 - 99 | PROFIT | Classic hospitals        |
| NXP43 - MILLSTREAM HOUSE                            | 10 - 99 | PROFIT | Independent health group |
| NT456 - BMI THE CASTLE CONSULTING CENTRE            | 10 - 99 | PROFIT | BMI                      |
| NT809 - CAPIO NORTH DOWNS HOSPITAL                  | 10 - 99 | PROFIT | Ramsay                   |
| 8A917 - BUPA RODING HOSPITAL                        | 10 - 99 | PROFIT | Bupa Classic             |
| NTH11 - LOURDES HOSPITAL                            | 10 - 99 | PROFIT | Classic hospitals        |
| 8A517 - BMI MANOR HOSPITAL                          | 10 - 99 | PROFIT | BMI                      |
| NT490 - BMI SOUTHEND PRIVATE HOSPITAL               | 10 - 99 | PROFIT | BMI                      |
| NTH08 - METHLEY PARK HOSPITAL                       | 10 - 99 | PROFIT | Classic hospitals        |
| NTY25 - HOLLY HOUSE HOSPITAL                        | 10 - 99 | PROFIT | Other                    |
| NEY01 - PIONEER HEALTHCARE LTD - CLAREMONT HOSPITAL | 10 - 99 | PROFIT | Pioneer                  |
| NEY14 - OAKLANDS HOSPITAL                           | 10 - 99 | PROFIT | Pioneer                  |
| NT407 - BMI - CHATSWORTH SUITE                      | 10 - 99 | PROFIT | BMI                      |
