# Supplementary material for: Outcomes for surgical procedures funded by the English health service but carried out in public versus independent hospitals: a database study
Source: PubMed Central journal article supplement (PMC9234423; doi:10.1136/bmjqs-2021-013522), 2021-09-07
Supplement: bmjqs-2021-013522supp008.pdf [file bmjqs-2021-013522supp008.pdf]

**Supplementary Table 6: Standardised mean difference (SMD) before and after propensity score matching.** Values of SMD > 0.1 are highlighted

| Covariate                  | Operation type | SMD before   | SMD after | Operation type | SMD before   | SMD after | Operation type | SMD before   | SMD after |
|----------------------------|----------------|--------------|-----------|----------------|--------------|-----------|----------------|--------------|-----------|
| Sex                        |                | 0.046        | 0.001     |                | <b>0.184</b> | 0.006     |                | 0.016        | 0.003     |
| Operation year             |                | <b>0.802</b> | 0.034     |                | <b>0.679</b> | 0.044     |                | <b>0.722</b> | 0.066     |
| Deprivation quintile       | F091           | 0.083        | 0.009     | T242           | <b>0.189</b> | 0.016     | W391           | <b>0.329</b> | 0.024     |
| Age                        |                | <b>0.177</b> | 0.019     |                | 0.074        | 0.011     |                | 0.025        | 0.009     |
| Charlson comorbidity score |                | 0.053        | 0.001     |                | <b>0.127</b> | 0.003     |                | <b>0.219</b> | 0.027     |
| Ethnicity                  |                | <b>0.171</b> | 0.020     |                | <b>0.334</b> | 0.037     |                | <b>0.568</b> | 0.012     |
| Sex                        |                | 0.090        | 0.000     |                | <b>0.188</b> | 0.013     |                | 0.040        | 0.008     |
| Operation year             |                | <b>0.726</b> | 0.023     |                | <b>0.647</b> | 0.037     |                | <b>0.685</b> | 0.032     |
| Deprivation quintile       | F093           | <b>0.106</b> | 0.014     | T243           | <b>0.188</b> | 0.012     | W401           | <b>0.225</b> | 0.018     |
| Age                        |                | <b>0.158</b> | 0.005     |                | <b>0.382</b> | 0.005     |                | 0.053        | 0.003     |
| Charlson comorbidity score |                | 0.032        | 0.008     |                | 0.050        | 0.002     |                | <b>0.195</b> | 0.003     |
| Ethnicity                  |                | <b>0.157</b> | 0.008     |                | <b>0.368</b> | 0.041     |                | <b>0.360</b> | 0.022     |
| Sex                        |                | <b>0.141</b> | 0.004     |                | <b>0.119</b> | 0.003     |                | 0.034        | 0.006     |
| Operation year             |                | <b>0.566</b> | 0.026     |                | <b>0.819</b> | 0.050     |                | <b>0.862</b> | 0.034     |
| Deprivation quintile       | J183           | <b>0.184</b> | 0.015     | T272           | <b>0.190</b> | 0.020     | W411           | <b>0.297</b> | 0.021     |
| Age                        |                | <b>0.152</b> | 0.000     |                | <b>0.214</b> | 0.009     |                | 0.055        | 0.009     |
| Charlson comorbidity score |                | <b>0.153</b> | 0.001     |                | <b>0.171</b> | 0.004     |                | <b>0.166</b> | 0.013     |
| Ethnicity                  |                | <b>0.313</b> | 0.019     |                | <b>0.358</b> | 0.043     |                | <b>0.203</b> | 0.022     |
| Sex                        |                | 0.027        | 0.005     |                | 0.016        | 0.000     |                | 0.048        | 0.038     |
| Operation year             |                | <b>0.663</b> | 0.055     |                | <b>0.565</b> | 0.032     |                | <b>0.494</b> | 0.085     |
| Deprivation quintile       | M653           | <b>0.225</b> | 0.014     | V255           | <b>0.226</b> | 0.019     | W421           | <b>0.366</b> | 0.042     |
| Age                        |                | <b>0.306</b> | 0.013     |                | <b>0.245</b> | 0.005     |                | 0.041        | 0.012     |
| Charlson comorbidity score |                | <b>0.431</b> | 0.012     |                | <b>0.195</b> | 0.004     |                | <b>0.341</b> | 0.011     |
| Ethnicity                  |                | <b>0.416</b> | 0.036     |                | <b>0.263</b> | 0.017     |                | <b>0.653</b> | 0.032     |
| Sex                        |                | 0.001        | 0.009     |                | 0.021        | 0.008     |                | 0.007        | 0.017     |
| Operation year             |                | <b>0.699</b> | 0.061     |                | <b>0.459</b> | 0.036     |                | <b>0.853</b> | 0.071     |
| Deprivation quintile       | Q074           | <b>0.140</b> | 0.039     | W371           | <b>0.250</b> | 0.012     | W931           | <b>0.332</b> | 0.042     |
| Age                        |                | <b>0.691</b> | 0.003     |                | <b>0.114</b> | 0.009     |                | 0.026        | 0.006     |
| Charlson comorbidity score |                | <b>0.734</b> | 0.037     |                | <b>0.310</b> | 0.007     |                | <b>0.233</b> | 0.010     |
| Ethnicity                  |                | <b>0.291</b> | 0.058     |                | <b>0.412</b> | 0.012     |                | <b>0.388</b> | 0.099     |
| Sex                        |                | 0.011        | 0.005     |                | 0.011        | 0.009     |                | 0.007        | 0.001     |
| Operation year             |                | <b>0.750</b> | 0.034     |                | <b>0.726</b> | 0.039     |                | <b>0.709</b> | 0.039     |
| Deprivation quintile       | T212           | <b>0.168</b> | 0.015     | W381           | <b>0.286</b> | 0.009     | W941           | <b>0.185</b> | 0.011     |
| Age                        |                | <b>0.201</b> | 0.003     |                | <b>0.105</b> | 0.002     |                | 0.002        | 0.013     |
| Charlson comorbidity score |                | <b>0.170</b> | 0.006     |                | <b>0.160</b> | 0.003     |                | <b>0.217</b> | 0.005     |
| Ethnicity                  |                | <b>0.285</b> | 0.046     |                | <b>0.259</b> | 0.034     |                | <b>0.248</b> | 0.025     |
