# Supplementary material for: Outcomes for surgical procedures funded by the English health service but carried out in public versus independent hospitals: a database study
Source: PubMed Central journal article supplement (PMC9234423; doi:10.1136/bmjqs-2021-013522), 2021-09-07

**Supplementary Figure 2: Histograms showing propensity score distribution before and after matching.** Blue-green histograms are for operations taking place in NHS hospitals where as red histograms show the distribution of propensity scores for operations taking place in ISHPs.

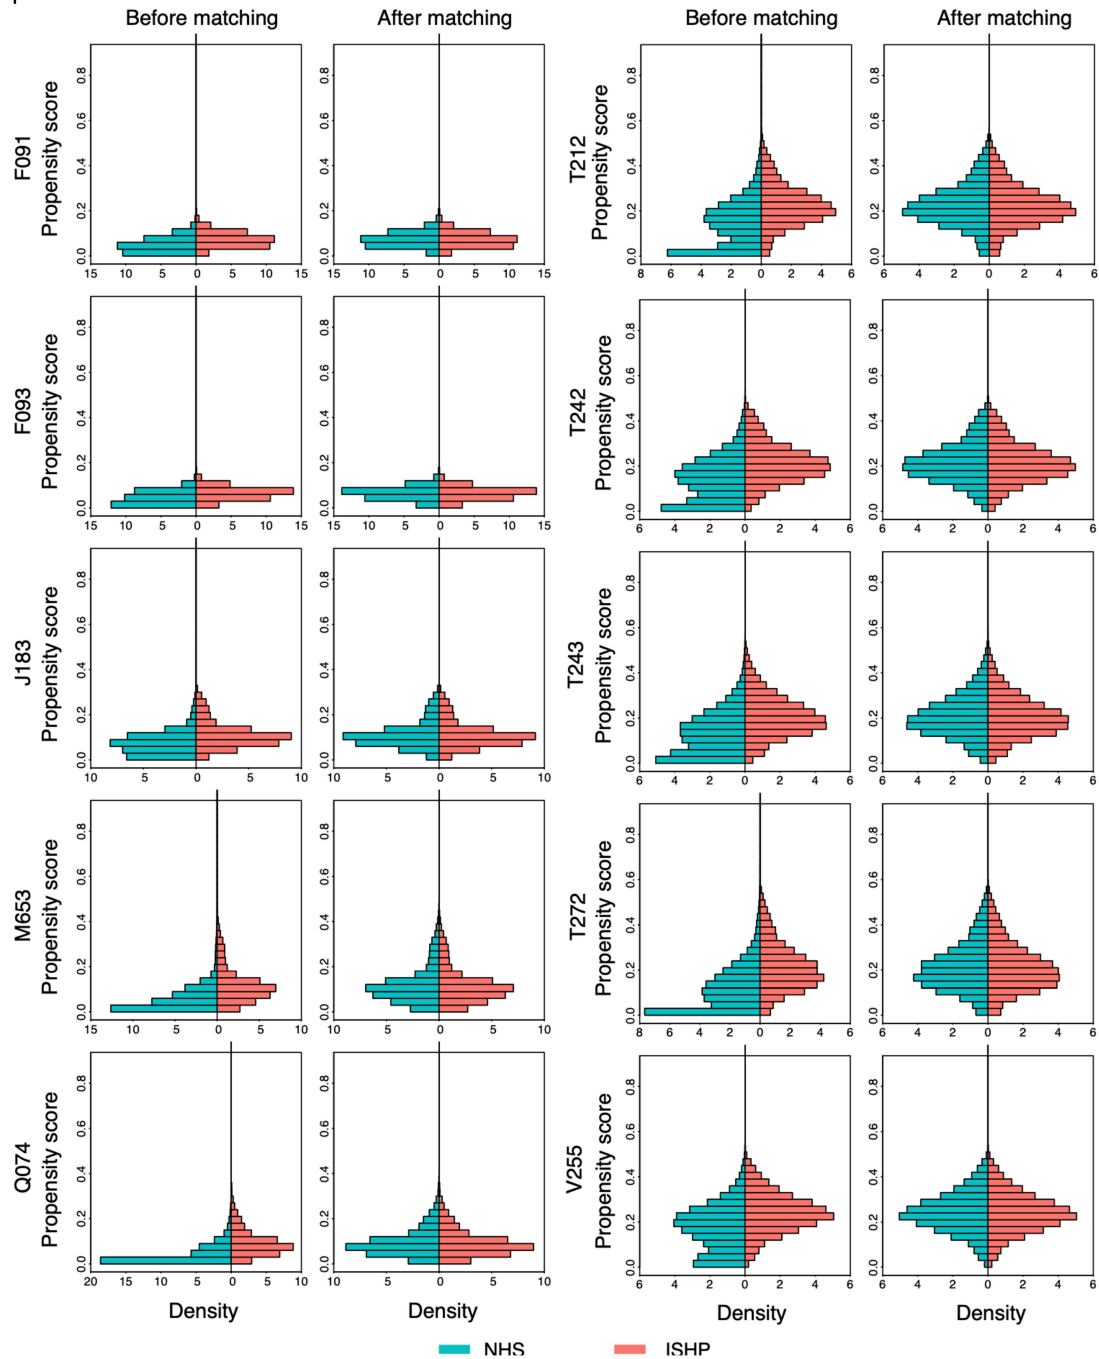

Supplementary Figure 2 cont.

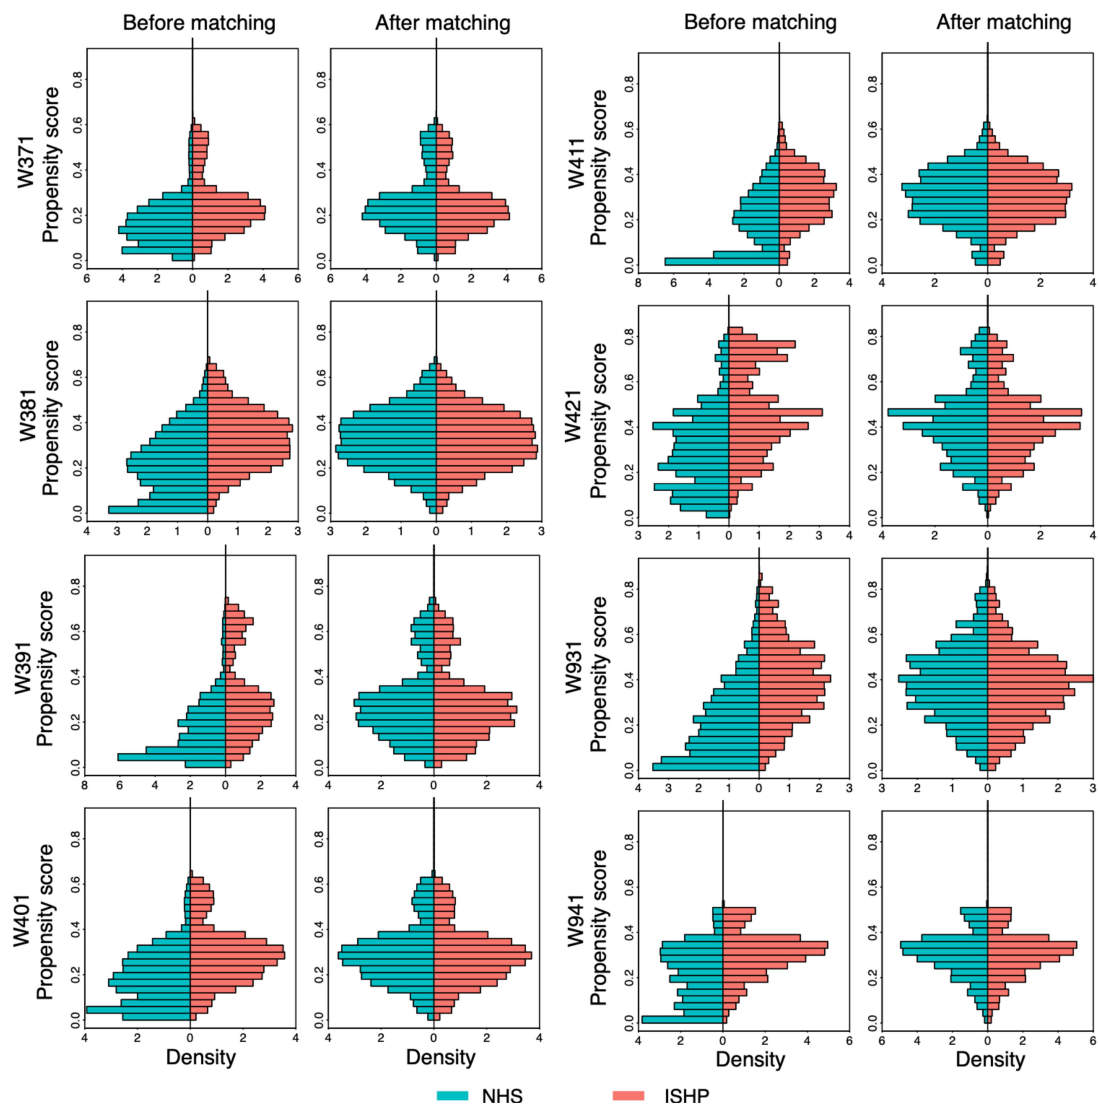

Supplement: bmjqs-2021-013522supp009.pdf [file bmjqs-2021-013522supp009.pdf]
