# Supplementary material for: Outcomes for surgical procedures funded by the English health service but carried out in public versus independent hospitals: a database study
Source: PubMed Central journal article supplement (PMC9234423; doi:10.1136/bmjqs-2021-013522), 2021-09-07
Supplement: bmjqs-2021-013522supp010.pdf [file bmjqs-2021-013522supp010.pdf]

**Supplementary Table 7: Event counts by operation type in the matched data**

| Operation type                | Total* | In-hospital death (A) |      | Emergency transfer (B1) |      | Non-emergency transfer (B2) |      | Long term stay (C) |      | Death (D)** |      | All cause readmission (E)** |      | Within-specialty readmission (E1)** |      |
|-------------------------------|--------|-----------------------|------|-------------------------|------|-----------------------------|------|--------------------|------|-------------|------|-----------------------------|------|-------------------------------------|------|
|                               |        | NHS                   | ISHP | NHS                     | ISHP | NHS                         | ISHP | NHS                | ISHP | NHS         | ISHP | NHS                         | ISHP | NHS                                 | ISHP |
| Wisdom tooth impacted         | 17184  | 0                     | ≤7*  | ≤7                      | 0    | ≤7                          | 0    | 0                  | 0    | ≤7          | 0    | 179                         | 128  | 79                                  | 42   |
| Wisdom tooth NEC              | 17626  | 0                     | 0    | 0                       | ≤7   | 11                          | ≤7   | 0                  | 0    | 0           | 0    | 195                         | 143  | 41                                  | 21   |
| Cholecystectomy**             | 20052  | ≤7                    | 0    | 11                      | 11   | 24                          | ≤7   | ≤7                 | 0    | ≤7          | ≤7   | 1393                        | 1070 | 1072                                | 815  |
| Prostate resection            | 10184  | ≤7                    | 0    | ≤7                      | 9    | 11                          | ≤7   | ≤7                 | 0    | 9           | ≤7   | 822                         | 525  | 425                                 | 253  |
| Hysterectomy                  | 13674  | ≤7                    | 0    | ≤7                      | ≤7   | ≤7                          | ≤7   | 0                  | 0    | 0           | ≤7   | 1233                        | 833  | 967                                 | 580  |
| IH repair (prosthetics)       | 8781   | 0                     | 0    | ≤7                      | ≤7   | ≤7                          | ≤7   | 0                  | 0    | ≤7          | ≤7   | 405                         | 237  | 248                                 | 121  |
| UH repair (prosthetics)       | 17296  | ≤7                    | 0    | 0                       | ≤7   | 11                          | ≤7   | ≤7                 | 0    | ≤7          | ≤7   | 809                         | 356  | 611                                 | 232  |
| UH repair (sutures)           | 13970  | ≤7                    | 0    | ≤7                      | 0    | ≤7                          | ≤7   | 0                  | 0    | ≤7          | ≤7   | 513                         | 254  | 358                                 | 149  |
| VH repair (prosthetics)       | 6322   | ≤7                    | ≤7   | ≤7                      | ≤7   | ≤7                          | ≤7   | ≤7                 | 0    | ≤7          | ≤7   | 358                         | 147  | 251                                 | 96   |
| Lumbar decompression          | 13770  | ≤7                    | ≤7   | 11                      | ≤7   | 50                          | ≤7   | ≤7                 | ≤7   | ≤7          | ≤7   | 595                         | 317  | 325                                 | 119  |
| THR (cemented)**              | 19975  | 22                    | ≤7   | 32                      | 46   | 270                         | 24   | 9                  | ≤7   | 17          | 15   | 1076                        | 888  | 411                                 | 307  |
| THR (no cement)**             | 19950  | 8                     | 0    | 21                      | 11   | 122                         | 13   | 11                 | ≤7   | 8           | 13   | 977                         | 685  | 317                                 | 211  |
| THR (NEC)                     | 3355   | ≤7                    | 0    | ≤7                      | ≤7   | 84                          | 0    | 8                  | ≤7   | ≤7          | ≤7   | 201                         | 131  | 65                                  | 36   |
| TKR (cemented)**              | 19837  | 13                    | ≤7   | 33                      | 38   | 127                         | 12   | ≤7                 | 0    | 11          | 13   | 1116                        | 818  | 420                                 | 208  |
| TKR (no cement)               | 6979   | ≤7                    | ≤7   | 12                      | 21   | 72                          | ≤7   | ≤7                 | ≤7   | ≤7          | ≤7   | 423                         | 293  | 137                                 | 63   |
| TKR (NEC)                     | 7738   | 10                    | ≤7   | ≤7                      | 16   | 144                         | 10   | ≤7                 | ≤7   | 8           | 16   | 489                         | 352  | 181                                 | 90   |
| THR (cemented acetabulum)     | 4326   | ≤7                    | 0    | ≤7                      | ≤7   | 27                          | ≤7   | 0                  | 0    | ≤7          | ≤7   | 249                         | 171  | 64                                  | 39   |
| THR (cemented femoral stem)** | 19968  | 15                    | ≤7   | 35                      | 39   | 156                         | 14   | ≤7                 | 0    | 9           | 13   | 1015                        | 725  | 362                                 | 187  |

\* Number of operations in each of the matched NHS and ISHP groups

\*\* D-E are events occurring within 28 days of discharge. Note that emergency readmission and death may both occur

+ Small numbers ≤7 have been censored for non-identifiability purposes.

++ The raw data set for these operation types was randomly subsampled so as to reduce the computational expense of the matching process.
