# Supplementary material for: Outcomes for surgical procedures funded by the English health service but carried out in public versus independent hospitals: a database study
Source: PubMed Central journal article supplement (PMC9234423; doi:10.1136/bmjqs-2021-013522), 2021-09-07
Supplement: bmjqs-2021-013522supp012.pdf [file bmjqs-2021-013522supp012.pdf]

**Supplementary Table 8: Hazard ratios for all in-hospital outcomes (discharge, in-hospital death, between-hospital transfer).** Results highlighted in bold are significant at the 95% level. The \* indicates hazard ratios that could not be reliably estimated because there were zero events for one or both of the provider types.

| Operation                   | Hazard ratio (95% CI) for ISHP vs NHS hospital |                         |                            |                         |  |
|-----------------------------|------------------------------------------------|-------------------------|----------------------------|-------------------------|--|
|                             | Discharge                                      | Death                   | Emergency transfer         | Other transfer          |  |
| Wisdom tooth impacted       | <b>1.07 (1.05,1.09)</b>                        | *                       | *                          | *                       |  |
| Wisdom tooth NEC            | <b>1.08 (1.06,1.10)</b>                        | *                       | *                          | 0.09 (0.01,1.04)        |  |
| Cholecystectomy             | <b>1.34 (1.25,1.45)</b>                        | *                       | 2.07 (0.70,6.13)           | 0.57 (0.18,1.77)        |  |
| Prostate resection          | <b>1.59 (1.40,1.81)</b>                        | *                       | <b>17.57 (2.79,110.56)</b> | 0.35 (0.07,1.73)        |  |
| Hysterectomy                | <b>1.53 (1.36,1.73)</b>                        | *                       | 3.03 (0.53,17.53)          | 1.14 (0.26,4.96)        |  |
| IH repair (prosthetics)     | <b>1.24 (1.17,1.32)</b>                        | *                       | 0.78 (0.02,26.42)          | 0.28 (0.03,2.66)        |  |
| UH repair (prosthetics)     | <b>1.32 (1.26,1.39)</b>                        | *                       | *                          | <b>0.11 (0.01,0.87)</b> |  |
| UH repair (sutures)         | <b>1.18 (1.11,1.25)</b>                        | *                       | *                          | 3.48 (0.59,20.59)       |  |
| VH repair (prosthetics)     | <b>1.82 (1.70,1.96)</b>                        | 1.41 (0.14,13.90)       | 1.29 (0.06,27.22)          | 0.49 (0.05,5.30)        |  |
| Lumbar decompression        | <b>1.54 (1.35,1.77)</b>                        | 1.15 (0.08,16.92)       | 2.15 (0.87,5.30)           | <b>0.19 (0.06,0.65)</b> |  |
| THR (cemented)              | <b>1.81 (1.61,2.04)</b>                        | *                       | <b>3.14 (1.57,6.27)</b>    | <b>0.26 (0.15,0.46)</b> |  |
| THR (no cement)             | <b>1.79 (1.61,1.98)</b>                        | *                       | 0.83 (0.31,2.18)           | <b>0.32 (0.14,0.70)</b> |  |
| THR (NEC)                   | <b>2.15 (1.72,2.68)</b>                        | *                       | 1.79 (0.54,5.93)           | *                       |  |
| TKR (cemented)              | <b>1.90 (1.73,2.09)</b>                        | 0.26 (0.03,1.93)        | <b>2.23 (1.06,4.69)</b>    | <b>0.32 (0.16,0.67)</b> |  |
| TKR (no cement)             | <b>1.95 (1.65,2.29)</b>                        | 3.32 (0.47,23.36)       | <b>3.20 (1.46,6.99)</b>    | <b>0.18 (0.06,0.54)</b> |  |
| TKR (NEC)                   | <b>1.99 (1.72,2.29)</b>                        | 0.22 (0.03,1.74)        | <b>4.56 (1.35,15.33)</b>   | <b>0.19 (0.08,0.45)</b> |  |
| THR (cemented acetabulum)   | <b>1.75 (1.40,2.19)</b>                        | *                       | 1.24 (0.30,5.13)           | 1.14 (0.35,3.71)        |  |
| THR (cemented femoral stem) | <b>1.88 (1.69,2.10)</b>                        | <b>0.15 (0.02,0.94)</b> | <b>2.48 (1.11,5.53)</b>    | <b>0.27 (0.12,0.63)</b> |  |
