# Supplementary material for: Outcomes for surgical procedures funded by the English health service but carried out in public versus independent hospitals: a database study
Source: PubMed Central journal article supplement (PMC9234423; doi:10.1136/bmjqs-2021-013522), 2021-09-07
Supplement: bmjqs-2021-013522supp013.pdf [file bmjqs-2021-013522supp013.pdf]

**Supplementary Table 9: Hazard ratios for all outcomes post-discharge and within 28 days (readmission, death).** Results highlighted in bold are significant at the 95% level. The \* indicates hazard ratios that could not be reliably estimated because there were zero events for one or both of the provider types.

| Operation                   | Hazard ratio (95% CI) for ISHP vs NHS hospital |                         |                   |
|-----------------------------|------------------------------------------------|-------------------------|-------------------|
|                             | Within specialty readmission                   | All cause readmission   | Death             |
| Wisdom tooth impacted       | <b>0.53 (0.31,0.91)</b>                        | 0.71 (0.51,1.00)        | *                 |
| Wisdom tooth NEC            | <b>0.51 (0.29,0.91)</b>                        | <b>0.73 (0.54,1.00)</b> | *                 |
| Cholecystectomy             | <b>0.75 (0.67,0.85)</b>                        | <b>0.76 (0.69,0.84)</b> | 1.30 (0.36,4.73)  |
| Prostate resection          | <b>0.59 (0.45,0.77)</b>                        | <b>0.63 (0.55,0.72)</b> | 0.67 (0.23,1.97)  |
| Hysterectomy                | <b>0.59 (0.51,0.68)</b>                        | <b>0.66 (0.59,0.75)</b> | *                 |
| IH repair (prosthetics)     | <b>0.48 (0.39,0.60)</b>                        | <b>0.58 (0.49,0.68)</b> | 1.60 (0.33,7.76)  |
| UH repair (prosthetics)     | <b>0.38 (0.30,0.46)</b>                        | <b>0.43 (0.37,0.51)</b> | 2.07 (0.36,12.05) |
| UH repair (sutures)         | <b>0.41 (0.32,0.53)</b>                        | <b>0.49 (0.41,0.59)</b> | 1.12 (0.16,7.96)  |
| VH repair (prosthetics)     | <b>0.38 (0.29,0.49)</b>                        | <b>0.40 (0.34,0.48)</b> | 0.63 (0.12,3.42)  |
| Lumbar decompression        | <b>0.36 (0.28,0.46)</b>                        | <b>0.53 (0.45,0.62)</b> | 1.96 (0.37,10.51) |
| THR (cemented)              | <b>0.74 (0.61,0.88)</b>                        | <b>0.81 (0.72,0.92)</b> | 0.90 (0.46,1.77)  |
| THR (no cement)             | <b>0.66 (0.54,0.81)</b>                        | <b>0.69 (0.62,0.77)</b> | 1.80 (0.67,4.79)  |
| THR (NEC)                   | <b>0.54 (0.35,0.83)</b>                        | <b>0.63 (0.49,0.80)</b> | 2.08 (0.18,24.45) |
| TKR (cemented)              | <b>0.49 (0.40,0.59)</b>                        | <b>0.72 (0.66,0.80)</b> | 1.17 (0.53,2.58)  |
| TKR (no cement)             | <b>0.45 (0.33,0.62)</b>                        | <b>0.68 (0.57,0.81)</b> | 1.47 (0.30,7.16)  |
| TKR (NEC)                   | <b>0.49 (0.37,0.64)</b>                        | <b>0.70 (0.59,0.84)</b> | 1.85 (0.88,3.86)  |
| THR (cemented acetabulum)   | <b>0.60 (0.37,0.99)</b>                        | <b>0.68 (0.51,0.91)</b> | 2.95 (0.87,9.97)  |
| THR (cemented femoral stem) | <b>0.51 (0.41,0.63)</b>                        | <b>0.71 (0.62,0.81)</b> | 1.63 (0.75,3.53)  |
