# Supplementary material for: Outcomes for surgical procedures funded by the English health service but carried out in public versus independent hospitals: a database study
Source: PubMed Central journal article supplement (PMC9234423; doi:10.1136/bmjqs-2021-013522), 2021-09-07
Supplement: bmjqs-2021-013522supp015.pdf [file bmjqs-2021-013522supp015.pdf]

**Supplementary Table 10: Hazard ratios for all in-hospital outcomes (discharge, in-hospital death, between-hospital transfer), comparing NHS hospitals with for-profit ISHPs.** Results highlighted in bold are significant at the 95% level. The \* indicates hazard ratios that could not be reliably estimated because there were zero events for one or both of the provider types.

| Operation                   | Hazard ratio (95% CI) for for-profit ISHP vs NHS hospital |                         |                          |                         |
|-----------------------------|-----------------------------------------------------------|-------------------------|--------------------------|-------------------------|
|                             | Discharge                                                 | Death                   | Emergency transfer       | Other transfer          |
| Wisdom tooth impacted       | <b>1.07 (1.05,1.09)</b>                                   | *                       | *                        | *                       |
| Wisdom tooth NEC            | <b>1.08 (1.06,1.09)</b>                                   | *                       | *                        | 0.14 (0.01,1.72)        |
| Cholecystectomy             | <b>1.37 (1.26,1.48)</b>                                   | *                       | 0.69 (0.16,2.97)         | 0.30 (0.06,1.50)        |
| Prostate resection          | <b>1.65 (1.43,1.90)</b>                                   | *                       | <b>4.69 (1.37,16.01)</b> | 0.54 (0.10,2.97)        |
| Hysterectomy                | <b>1.58 (1.39,1.80)</b>                                   | *                       | 5.45 (0.89,33.39)        | 0.40 (0.09,1.81)        |
| IH repair (prosthetics)     | <b>1.28 (1.20,1.37)</b>                                   | *                       | *                        | 0.91 (0.07,11.55)       |
| UH repair (prosthetics)     | <b>1.36 (1.28,1.43)</b>                                   | *                       | <b>9.38 (1.77,49.58)</b> | 0.17 (0.02,1.45)        |
| UH repair (sutures)         | <b>1.20 (1.12,1.28)</b>                                   | *                       | *                        | 0.33 (0.03,3.15)        |
| VH repair (prosthetics)     | <b>1.89 (1.75,2.05)</b>                                   | *                       | *                        | 0.25 (0.03,2.21)        |
| Lumbar decompression        | <b>1.51 (1.30,1.75)</b>                                   | 0.76 (0.09,6.64)        | 0.49 (0.10,2.46)         | <b>0.08 (0.01,0.59)</b> |
| THR (cemented)              | <b>1.84 (1.63,2.08)</b>                                   | <b>0.16 (0.04,0.67)</b> | 1.17 (0.47,2.92)         | <b>0.24 (0.11,0.53)</b> |
| THR (no cement)             | <b>1.78 (1.58,1.99)</b>                                   | *                       | 0.66 (0.29,1.49)         | <b>0.26 (0.13,0.52)</b> |
| THR (NEC)                   | <b>2.51 (1.93,3.25)</b>                                   | *                       | 1.26 (0.29,5.42)         | *                       |
| TKR (cemented)              | <b>1.94 (1.76,2.15)</b>                                   | 0.31 (0.05,2.13)        | 0.90 (0.41,1.96)         | <b>0.24 (0.12,0.51)</b> |
| TKR (no cement)             | <b>2.14 (1.79,2.54)</b>                                   | *                       | 2.06 (0.78,5.41)         | *                       |
| TKR (NEC)                   | <b>2.08 (1.83,2.36)</b>                                   | 0.18 (0.02,1.60)        | 1.71 (0.57,5.17)         | <b>0.22 (0.09,0.54)</b> |
| THR (cemented acetabulum)   | <b>1.84 (1.56,2.17)</b>                                   | *                       | 0.68 (0.07,6.72)         | 1.44 (0.30,6.84)        |
| THR (cemented femoral stem) | <b>1.91 (1.69,2.16)</b>                                   | 0.21 (0.03,1.30)        | 0.58 (0.20,1.72)         | <b>0.04 (0.01,0.19)</b> |
