# Supplementary material for: Outcomes for surgical procedures funded by the English health service but carried out in public versus independent hospitals: a database study
Source: HighWire-hosted journal article supplement (doi:10.1136/bmjqs-2021-013522), 2021-09-07
Supplement: bmjqs-2021-013522supp016_data_supplement.pdf [file bmjqs-2021-013522supp016_data_supplement.pdf]

**Supplementary Table 11: Hazard ratios for all outcomes post-discharge and within 28 days (readmission, death), comparing NHS hospitals and for-profit ISHPs.** Results highlighted in bold are significant at the 95% level. The \* indicates hazard ratios that could not be reliably estimated because there were zero events for one or both of the provider types.

| Operation                   | Hazard ratio (95% CI) for for-profit ISHPs vs NHS hospitals |                         |                   |
|-----------------------------|-------------------------------------------------------------|-------------------------|-------------------|
|                             | Within specialty readmission                                | All-cause readmission   | Death             |
| Wisdom tooth impacted       | <b>0.44 (0.26,0.74)</b>                                     | <b>0.62 (0.45,0.87)</b> | *                 |
| Wisdom tooth NEC            | <b>0.37 (0.20,0.67)</b>                                     | 0.72 (0.50,1.02)        | *                 |
| Cholecystectomy             | <b>0.72 (0.64,0.80)</b>                                     | <b>0.71 (0.64,0.78)</b> | *                 |
| Prostate resection          | <b>0.47 (0.35,0.63)</b>                                     | <b>0.56 (0.48,0.65)</b> | 0.75 (0.26,2.15)  |
| Hysterectomy                | <b>0.58 (0.50,0.66)</b>                                     | <b>0.65 (0.58,0.73)</b> | 1.00 (0.06,15.37) |
| IH repair (prosthetics)     | <b>0.44 (0.35,0.55)</b>                                     | <b>0.54 (0.46,0.65)</b> | 1.25 (0.34,4.53)  |
| UH repair (prosthetics)     | <b>0.41 (0.33,0.52)</b>                                     | <b>0.45 (0.38,0.53)</b> | 0.50 (0.09,2.63)  |
| UH repair (sutures)         | <b>0.44 (0.34,0.57)</b>                                     | <b>0.51 (0.42,0.62)</b> | 0.33 (0.04,3.16)  |
| VH repair (prosthetics)     | <b>0.32 (0.25,0.42)</b>                                     | <b>0.34 (0.28,0.42)</b> | 1.00 (0.14,7.05)  |
| Lumbar decompression        | <b>0.40 (0.30,0.52)</b>                                     | <b>0.55 (0.47,0.66)</b> | 1.00 (0.17,5.86)  |
| THR (cemented)              | 0.84 (0.71,1.00)                                            | 0.90 (0.80,1.02)        | 1.04 (0.52,2.11)  |
| THR (no cement)             | <b>0.80 (0.64,1.00)</b>                                     | <b>0.74 (0.66,0.84)</b> | 0.99 (0.37,2.64)  |
| THR (NEC)                   | <b>0.53 (0.33,0.85)</b>                                     | <b>0.66 (0.51,0.84)</b> | 0.97 (0.13,7.15)  |
| TKR (cemented)              | <b>0.53 (0.44,0.65)</b>                                     | <b>0.73 (0.67,0.81)</b> | 1.16 (0.53,2.53)  |
| TKR (no cement)             | <b>0.38 (0.25,0.57)</b>                                     | <b>0.70 (0.57,0.86)</b> | 1.49 (0.26,8.59)  |
| TKR (NEC)                   | <b>0.48 (0.35,0.64)</b>                                     | <b>0.73 (0.62,0.85)</b> | 2.13 (0.76,5.92)  |
| THR (cemented acetabulum)   | <b>0.55 (0.34,0.90)</b>                                     | <b>0.64 (0.47,0.87)</b> | 1.49 (0.29,7.72)  |
| THR (cemented femoral stem) | <b>0.67 (0.53,0.84)</b>                                     | <b>0.76 (0.66,0.87)</b> | 1.54 (0.65,3.67)  |
