# Supplementary material for: Outcomes for surgical procedures funded by the English health service but carried out in public versus independent hospitals: a database study
Source: PubMed Central journal article supplement (PMC9234423; doi:10.1136/bmjqs-2021-013522), 2021-09-07
Supplement: bmjqs-2021-013522supp017.pdf [file bmjqs-2021-013522supp017.pdf]

**Supplementary Figure 5: Cumulative incidence of discharge and readmission split by provider type and stratified by the time window in which the operation took place.** The early and late time periods correspond to pre- and post- 1<sup>st</sup> Jan 2014 respectively. Cumulative incidence of discharge is shown in the first and third columns while readmission is shown in the second and fourth columns.

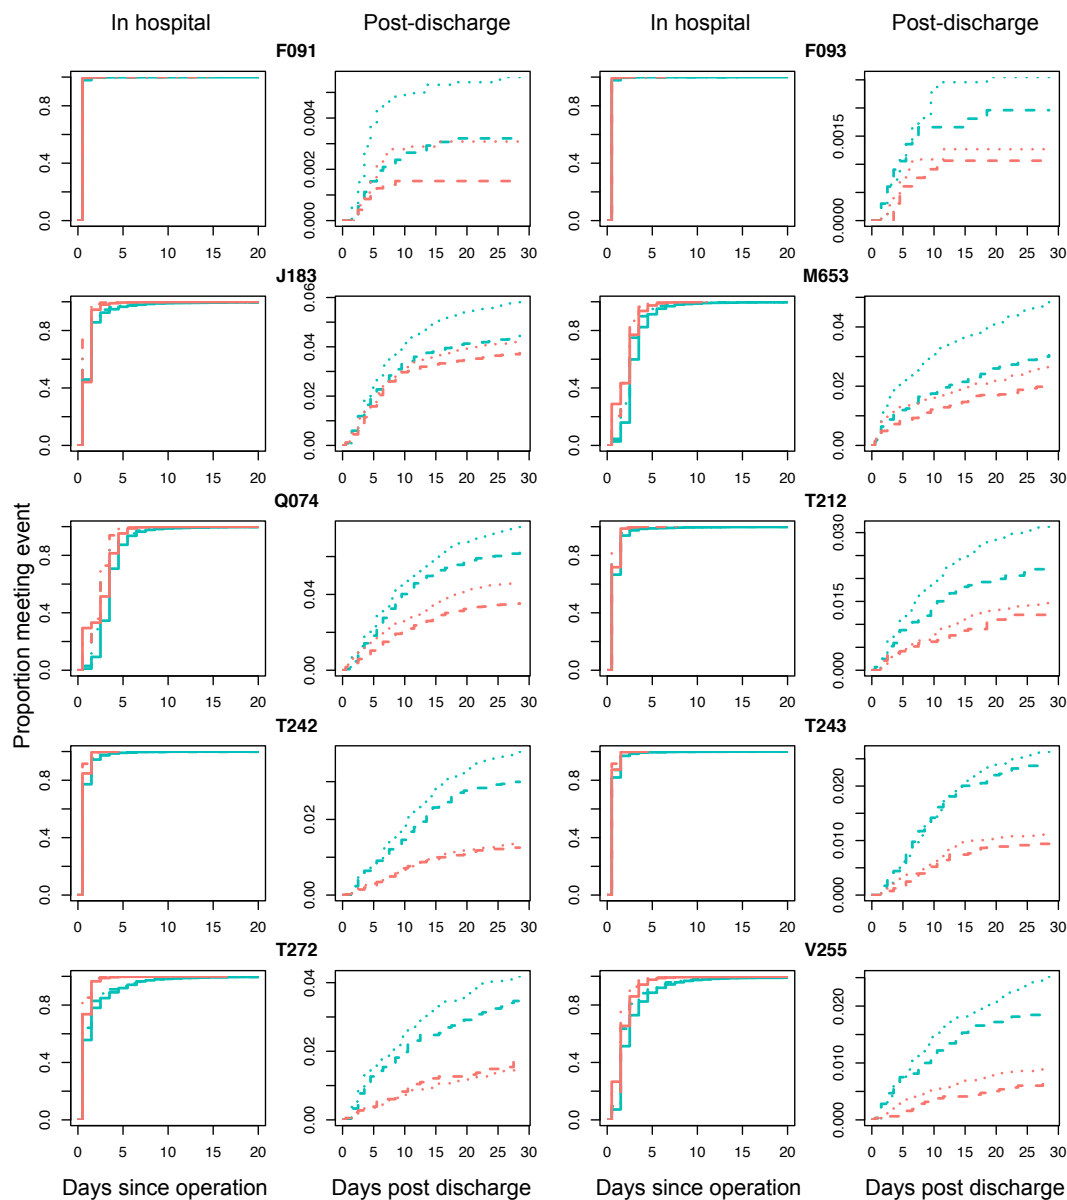

Key: In hospital event (discharge)

— NHS:early    - - - NHS:late  
 — ISHP:early    - - - ISHP:late

Key: Post-discharge event (readmission)

- - - NHS:early    ···· NHS:late  
 - - - ISHP:early    ···· ISHP:late

**Supplementary Figure 5 (cont.)**

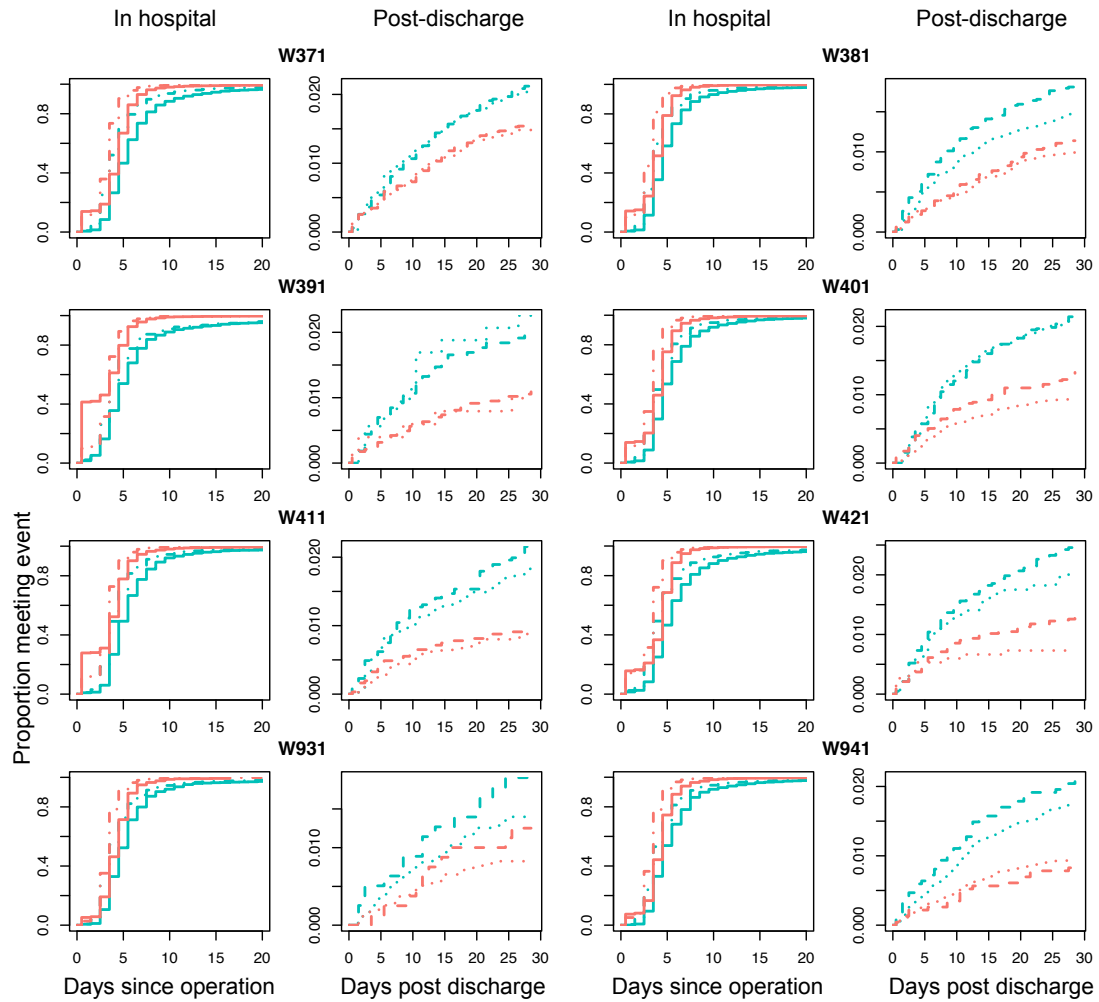

Key: In hospital event (discharge)

— NHS:early    - - - NHS:late  
 — ISHP:early    - - - ISHP:late

Key: Post-discharge event (readmission)

- - - NHS:early    ···· NHS:late  
 - - - ISHP:early    ···· ISHP:late
