# Supplementary material for: Outcomes for surgical procedures funded by the English health service but carried out in public versus independent hospitals: a database study
Source: PubMed Central journal article supplement (PMC9234423; doi:10.1136/bmjqs-2021-013522), 2021-09-07
Supplement: bmjqs-2021-013522supp019.pdf [file bmjqs-2021-013522supp019.pdf]

**Supplementary Table 12: Hazard ratios for all in-hospital outcomes (discharge, in-hospital death, between-hospital transfer), when matching was done using Elixhauser comorbidity categories.** Results highlighted in bold are significant at the 95% level. The \* indicates hazard ratios that could not be reliably estimated because there were zero events for one or both of the provider types.

| Operation                   | Hazard ratio (95% CI) for ISHP vs NHS hospital |                   |                          |                         |
|-----------------------------|------------------------------------------------|-------------------|--------------------------|-------------------------|
|                             | Discharge                                      | Death             | Emergency transfer       | Other transfer          |
| Wisdom tooth impacted       | <b>1.06 (1.04,1.08)</b>                        | *                 | *                        | *                       |
| Wisdom tooth NEC            | <b>1.08 (1.06,1.10)</b>                        | *                 | *                        | 0.12 (0.01,1.31)        |
| Cholecystectomy             | <b>1.31 (1.21,1.41)</b>                        | *                 | 3.32 (0.92,11.92)        | 0.73 (0.23,2.33)        |
| Prostate resection          | <b>1.55 (1.36,1.77)</b>                        | *                 | <b>4.40 (1.06,18.20)</b> | 0.71 (0.13,3.81)        |
| Hysterectomy                | <b>1.50 (1.33,1.69)</b>                        | *                 | 1.89 (0.56,6.37)         | 0.75 (0.21,2.74)        |
| IH repair (prosthetics)     | <b>1.26 (1.18,1.34)</b>                        | *                 | 0.79 (0.02,26.54)        | 0.55 (0.05,5.82)        |
| UH repair (prosthetics)     | <b>1.33 (1.26,1.40)</b>                        | *                 | 1.11 (0.19,6.58)         | 0.18 (0.02,1.47)        |
| UH repair (sutures)         | <b>1.16 (1.09,1.23)</b>                        | *                 | *                        | 0.86 (0.07,9.96)        |
| VH repair (prosthetics)     | <b>1.79 (1.66,1.92)</b>                        | *                 | 1.15 (0.07,20.12)        | 1.00 (0.06,15.96)       |
| Lumbar decompression        | <b>1.51 (1.32,1.73)</b>                        | 2.60 (0.36,18.80) | 1.22 (0.41,3.58)         | <b>0.21 (0.06,0.72)</b> |
| THR (cemented)              | <b>1.73 (1.53,1.96)</b>                        | 0.28 (0.07,1.17)  | <b>2.50 (1.32,4.75)</b>  | <b>0.33 (0.20,0.54)</b> |
| THR (no cement)             | <b>1.73 (1.55,1.93)</b>                        | *                 | 0.86 (0.36,2.07)         | <b>0.32 (0.16,0.65)</b> |
| THR (NEC)                   | <b>2.03 (1.63,2.54)</b>                        | *                 | 0.98 (0.30,3.18)         | *                       |
| TKR (cemented)              | <b>1.85 (1.68,2.03)</b>                        | 0.24 (0.03,1.82)  | <b>2.54 (1.20,5.38)</b>  | <b>0.33 (0.17,0.65)</b> |
| TKR (no cement)             | <b>1.88 (1.60,2.20)</b>                        | 0.56 (0.08,4.06)  | <b>3.74 (1.67,8.37)</b>  | <b>0.15 (0.05,0.43)</b> |
| TKR (NEC)                   | <b>1.94 (1.68,2.23)</b>                        | 0.21 (0.02,1.80)  | 3.13 (1.00,9.82)         | <b>0.19 (0.09,0.40)</b> |
| THR (cemented acetabulum)   | <b>1.73 (1.38,2.17)</b>                        | *                 | 1.76 (0.37,8.41)         | 1.26 (0.46,3.41)        |
| THR (cemented femoral stem) | <b>1.77 (1.59,1.97)</b>                        | 0.25 (0.04,1.64)  | 2.35 (0.99,5.58)         | <b>0.34 (0.15,0.78)</b> |
