# Supplementary material for: Outcomes for surgical procedures funded by the English health service but carried out in public versus independent hospitals: a database study
Source: PubMed Central journal article supplement (PMC9234423; doi:10.1136/bmjqs-2021-013522), 2021-09-07
Supplement: bmjqs-2021-013522supp020.pdf [file bmjqs-2021-013522supp020.pdf]

**Supplementary Table 13: Hazard ratios for all outcomes post-discharge and within 28 days (readmission, death), when matching was done using Elixhauser comorbidity categories.**

Results highlighted in bold are significant at the 95% level. The \* indicates hazard ratios that could not be reliably estimated because there were zero events for one or both of the provider types.

| Hazard ratio (95% CI) for ISHP vs NHS hospital |                              |                         |                          |
|------------------------------------------------|------------------------------|-------------------------|--------------------------|
| Operation                                      | Within specialty readmission | All cause readmission   | Death                    |
| Wisdom tooth impacted                          | <b>0.50 (0.29,0.85)</b>      | <b>0.64 (0.46,0.91)</b> | *                        |
| Wisdom tooth NEC                               | <b>0.42 (0.23,0.77)</b>      | <b>0.70 (0.51,0.95)</b> | *                        |
| Cholecystectomy                                | <b>0.81 (0.72,0.92)</b>      | <b>0.81 (0.73,0.89)</b> | 1.67 (0.41,6.77)         |
| Prostate resection                             | <b>0.52 (0.40,0.68)</b>      | <b>0.60 (0.53,0.69)</b> | 0.56 (0.17,1.82)         |
| Hysterectomy                                   | <b>0.58 (0.50,0.66)</b>      | <b>0.66 (0.59,0.74)</b> | *                        |
| IH repair (prosthetics)                        | <b>0.46 (0.37,0.57)</b>      | <b>0.57 (0.48,0.67)</b> | 1.25 (0.35,4.50)         |
| UH repair (prosthetics)                        | <b>0.37 (0.30,0.46)</b>      | <b>0.43 (0.36,0.50)</b> | 1.33 (0.31,5.71)         |
| UH repair (sutures)                            | <b>0.40 (0.32,0.52)</b>      | <b>0.49 (0.41,0.58)</b> | 2.00 (0.18,22.00)        |
| VH repair (prosthetics)                        | <b>0.36 (0.28,0.46)</b>      | <b>0.40 (0.33,0.48)</b> | 0.67 (0.11,3.95)         |
| Lumbar decompression                           | <b>0.42 (0.33,0.54)</b>      | <b>0.56 (0.48,0.66)</b> | 1.33 (0.31,5.63)         |
| THR (cemented)                                 | 0.93 (0.78,1.12)             | 0.90 (0.79,1.01)        | 1.20 (0.59,2.47)         |
| THR (no cement)                                | <b>0.65 (0.52,0.81)</b>      | <b>0.69 (0.61,0.79)</b> | 1.59 (0.73,3.46)         |
| THR (NEC)                                      | <b>0.55 (0.37,0.83)</b>      | <b>0.66 (0.52,0.83)</b> | *                        |
| TKR (cemented)                                 | <b>0.49 (0.40,0.59)</b>      | <b>0.77 (0.69,0.86)</b> | 1.08 (0.50,2.32)         |
| TKR (no cement)                                | <b>0.44 (0.32,0.60)</b>      | <b>0.71 (0.60,0.84)</b> | 1.32 (0.28,6.21)         |
| TKR (NEC)                                      | <b>0.54 (0.41,0.72)</b>      | <b>0.74 (0.61,0.90)</b> | <b>3.68 (1.28,10.54)</b> |
| THR (cemented acetabulum)                      | 0.71 (0.43,1.18)             | <b>0.69 (0.52,0.91)</b> | 5.98 (0.94,38.11)        |
| THR (cemented femoral stem)                    | <b>0.57 (0.45,0.72)</b>      | <b>0.78 (0.69,0.89)</b> | 1.49 (0.62,3.60)         |
