# Supplementary material for: Outcomes for surgical procedures funded by the English health service but carried out in public versus independent hospitals: a database study
Source: PubMed Central journal article supplement (PMC9234423; doi:10.1136/bmjqs-2021-013522), 2021-09-07
Supplement: bmjqs-2021-013522supp021.pdf [file bmjqs-2021-013522supp021.pdf]

**Supplementary Table 14: Hazard ratios for all in-hospital outcomes (discharge, in-hospital death, between-hospital transfer), for Cox models run on raw (unmatched) data with adjustment.** Results highlighted in bold are significant at the 95% level. The \* indicates hazard ratios that could not be reliably estimated because there were zero events for one or both of the provider types.

| Operation                   | Hazard ratio (95% CI) for ISHP vs NHS hospital |                           |                           |                          |
|-----------------------------|------------------------------------------------|---------------------------|---------------------------|--------------------------|
|                             | Discharge                                      | Death                     | Emergency transfer        | Other transfer           |
| Wisdom tooth impacted       | <b>1.06 (1.04, 1.08)</b>                       | 3.32 (0.26, 41.95)        | *                         | *                        |
| Wisdom tooth NEC            | <b>1.07 (1.06, 1.08)</b>                       | *                         | 1.57 (0.46, 5.38)         | 0.10 (0.01, 1.06)        |
| Cholecystectomy             | <b>1.38 (1.28, 1.48)</b>                       | *                         | <b>2.06 (1.17, 3.65)</b>  | 0.66 (0.36, 1.22)        |
| Prostate resection          | <b>1.64 (1.42, 1.88)</b>                       | *                         | <b>5.26 (1.86, 14.84)</b> | 0.55 (0.14, 2.26)        |
| Hysterectomy                | <b>1.63 (1.43, 1.85)</b>                       | *                         | 2.82 (0.91, 8.78)         | 0.81 (0.27, 2.43)        |
| IH repair (prosthetics)     | <b>1.25 (1.18, 1.33)</b>                       | *                         | 0.68 (0.07, 6.28)         | 0.32 (0.04, 2.61)        |
| UH repair (prosthetics)     | <b>1.32 (1.26, 1.38)</b>                       | *                         | 2.16 (0.47, 9.86)         | 0.17 (0.02, 1.37)        |
| UH repair (sutures)         | <b>1.14 (1.08, 1.22)</b>                       | *                         | *                         | 0.24 (0.03, 1.90)        |
| VH repair (prosthetics)     | <b>1.86 (1.74, 1.99)</b>                       | <b>6.49 (1.17, 35.98)</b> | 2.55 (0.25, 26.51)        | 0.71 (0.10, 4.79)        |
| Lumbar decompression        | <b>1.58 (1.36, 1.83)</b>                       | 1.41 (0.21, 9.57)         | 1.31 (0.49, 3.47)         | <b>0.20 (0.06, 0.65)</b> |
| THR (cemented)              | <b>2.01 (1.79, 2.25)</b>                       | <b>0.15 (0.06, 0.40)</b>  | <b>2.14 (1.21, 3.79)</b>  | <b>0.26 (0.16, 0.42)</b> |
| THR (no cement)             | <b>1.93 (1.72, 2.16)</b>                       | <b>0.17 (0.04, 0.72)</b>  | 1.39 (0.76, 2.57)         | <b>0.32 (0.18, 0.57)</b> |
| THR (NEC)                   | <b>2.43 (1.93, 3.06)</b>                       | *                         | 1.32 (0.47, 3.73)         | *                        |
| TKR (cemented)              | <b>2.13 (1.93, 2.34)</b>                       | <b>0.19 (0.09, 0.38)</b>  | <b>1.68 (1.03, 2.73)</b>  | <b>0.32 (0.21, 0.50)</b> |
| TKR (no cement)             | <b>2.17 (1.89, 2.49)</b>                       | 0.30 (0.04, 2.64)         | <b>3.20 (1.58, 6.51)</b>  | <b>0.16 (0.06, 0.41)</b> |
| TKR (NEC)                   | <b>2.11 (1.87, 2.38)</b>                       | 0.16 (0.02, 1.28)         | <b>2.45 (1.29, 4.67)</b>  | <b>0.20 (0.09, 0.45)</b> |
| THR (cemented acetabulum)   | <b>1.99 (1.60, 2.49)</b>                       | *                         | 1.29 (0.27, 6.18)         | 1.09 (0.38, 3.14)        |
| THR (cemented femoral stem) | <b>2.06 (1.84, 2.31)</b>                       | 0.16 (0.03, 1.02)         | 1.92 (0.96, 3.84)         | <b>0.30 (0.13, 0.70)</b> |
