# Supplementary material for: Outcomes for surgical procedures funded by the English health service but carried out in public versus independent hospitals: a database study
Source: PubMed Central journal article supplement (PMC9234423; doi:10.1136/bmjqs-2021-013522), 2021-09-07
Supplement: bmjqs-2021-013522supp022.pdf [file bmjqs-2021-013522supp022.pdf]

**Supplementary Table 15: Hazard ratios for all outcomes post-discharge and within 28 days (readmission, death), for Cox models run on raw (unmatched) data with adjustment.**

Results highlighted in bold are significant at the 95% level. The \* indicates hazard ratios that could not be reliably estimated because there were zero events for one or both of the provider types.

| Operation                   | Hazard ratio (95% CI) for ISHP vs NHS hospital |                          |                           |
|-----------------------------|------------------------------------------------|--------------------------|---------------------------|
|                             | Within specialty readmission                   | All cause readmission    | Death                     |
| Wisdom tooth impacted       | <b>0.50 (0.31, 0.81)</b>                       | <b>0.66 (0.48, 0.90)</b> | *                         |
| Wisdom tooth NEC            | <b>0.41 (0.23, 0.75)</b>                       | <b>0.72 (0.56, 0.92)</b> | *                         |
| Cholecystectomy             | <b>0.72 (0.65, 0.79)</b>                       | <b>0.72 (0.66, 0.78)</b> | 1.03 (0.56, 1.89)         |
| Prostate resection          | <b>0.53 (0.41, 0.69)</b>                       | <b>0.61 (0.54, 0.69)</b> | 0.80 (0.35, 1.84)         |
| Hysterectomy                | <b>0.60 (0.53, 0.68)</b>                       | <b>0.69 (0.62, 0.76)</b> | 0.43 (0.06, 2.96)         |
| IH repair (prosthetics)     | <b>0.47 (0.39, 0.57)</b>                       | <b>0.59 (0.52, 0.68)</b> | 1.57 (0.60, 4.10)         |
| UH repair (prosthetics)     | <b>0.37 (0.30, 0.46)</b>                       | <b>0.43 (0.37, 0.50)</b> | 0.97 (0.35, 2.72)         |
| UH repair (sutures)         | <b>0.42 (0.33, 0.54)</b>                       | <b>0.49 (0.42, 0.59)</b> | 0.84 (0.20, 3.57)         |
| VH repair (prosthetics)     | <b>0.34 (0.27, 0.43)</b>                       | <b>0.37 (0.32, 0.44)</b> | 1.12 (0.27, 4.65)         |
| Lumbar decompression        | <b>0.38 (0.30, 0.48)</b>                       | <b>0.54 (0.47, 0.62)</b> | 1.29 (0.45, 3.75)         |
| THR (cemented)              | <b>0.79 (0.70, 0.89)</b>                       | <b>0.82 (0.76, 0.89)</b> | 0.98 (0.67, 1.43)         |
| THR (no cement)             | <b>0.65 (0.55, 0.77)</b>                       | <b>0.70 (0.65, 0.77)</b> | 1.21 (0.75, 1.95)         |
| THR (NEC)                   | <b>0.58 (0.41, 0.81)</b>                       | <b>0.65 (0.53, 0.79)</b> | 0.85 (0.23, 3.19)         |
| TKR (cemented)              | <b>0.50 (0.45, 0.56)</b>                       | <b>0.72 (0.68, 0.77)</b> | 1.16 (0.91, 1.49)         |
| TKR (no cement)             | <b>0.43 (0.32, 0.58)</b>                       | <b>0.69 (0.58, 0.82)</b> | 1.33 (0.36, 4.98)         |
| TKR (NEC)                   | <b>0.50 (0.40, 0.63)</b>                       | <b>0.71 (0.61, 0.83)</b> | <b>2.97 (1.36, 6.48)</b>  |
| THR (cemented acetabulum)   | <b>0.55 (0.35, 0.85)</b>                       | <b>0.64 (0.51, 0.80)</b> | <b>4.71 (1.75, 12.72)</b> |
| THR (cemented femoral stem) | <b>0.59 (0.49, 0.71)</b>                       | <b>0.75 (0.67, 0.84)</b> | 1.36 (0.74, 2.48)         |
