# Supplementary material for: Outcomes for surgical procedures funded by the English health service but carried out in public versus independent hospitals: a database study
Source: BMJ Qual Saf. 2021 Sep 7;31(7):515–25. doi: 10.1136/bmjqs-2021-013522 (PMC9234423; doi:10.1136/bmjqs-2021-013522)
Supplement: Supplementary data [file bmjqs-2021-013522supp002.pdf]

**Supplementary Table 1: Summary of studies comparing outcomes of elective surgery in English NHS hospitals and Independent Sector Hospital Providers**

| Ref                                                      | Study type                 | Data years | Procedures                                                                                  | Outcomes                                                                                                                                                                       | Hospitals                                                         | Adjustment                                                                                                                                                     | Results summary                                                                                                                                                                                               |
|----------------------------------------------------------|----------------------------|------------|---------------------------------------------------------------------------------------------|--------------------------------------------------------------------------------------------------------------------------------------------------------------------------------|-------------------------------------------------------------------|----------------------------------------------------------------------------------------------------------------------------------------------------------------|---------------------------------------------------------------------------------------------------------------------------------------------------------------------------------------------------------------|
| <b>Browne et al (BMC Health Services Research, 2008)</b> | Prospective cohort study   | 2006-2007  | Hip or knee replacement, inguinal hernia repair, varicose vein surgery, cataract extraction | Change in patient-reported health status and health related quality of life. Patient-reported post-operative complications                                                     | 6 ISHPs, 20 NHS providers                                         | Disease severity, duration of symptoms, age, sex, socioeconomic status, previous similar surgery, general health, comorbidity                                  | Mixed: no difference in most outcomes, but for some operations patients treated in ISHPs reported greater improvement, while for hernia repair patients treated in NHS hospitals reported greater improvement |
| <b>Chard et al (BMJ, 2011)</b>                           | Prospective cohort study   | 2008-2009  | Hip or knee replacement, inguinal hernia repair, varicose vein surgery                      | Symptoms and disability reported by patients (Oxford hip and knee scores on a 48 point scale; Aberdeen varicose vein questionnaire) and quality of life (EuroQol EQ-5D score). | 25 ISHPs, 72 NHS providers invited (not all chose to participate) | Adjusted for case-mix based on age, sex, socio-economic circumstances and preoperative questionnaire which asked about severity of symptoms and general health | Some outcomes were better in ISHPs, particularly for orthopaedic surgery.                                                                                                                                     |
| <b>Siciliani et al (Health Econ, 2013)</b>               | Retrospective cohort study | 2006-2007  | Hip replacement                                                                             | Length of stay                                                                                                                                                                 | 179 NHS providers, 14 ISHPs                                       | Age, gender, number and type of diagnoses, deprivation, regional variation                                                                                     | Shorter length of stay associated with treatment at an ISHP                                                                                                                                                   |

|                    |                            |           |                 |             |                             |                                                 |                                                                                                   |
|--------------------|----------------------------|-----------|-----------------|-------------|-----------------------------|-------------------------------------------------|---------------------------------------------------------------------------------------------------|
| Appleby (BMJ 2020) | Retrospective cohort study | 2018-2019 | Hip replacement | EQ-5D score | 122 NHS providers, 90 ISHPs | PROMs risk-adjustment model (based on HES data) | Average health gain was slightly better among patients treated by non-NHS (independent) providers |
|--------------------|----------------------------|-----------|-----------------|-------------|-----------------------------|-------------------------------------------------|---------------------------------------------------------------------------------------------------|

Articles were identified using the following search terms in Google Scholar:  
NHS AROUND(10) ( private OR "independent provider" OR "independent sector" ) surgery operation hospital provider outcome  
The first 40 abstracts were read to identify those studies pertaining to outcomes following surgery in English hospitals, with independent and NHS providers compared. All studies referenced in the following systematic review were similarly examined:

Kruse, F. M., Stadhouders, N. W., Adang, E. M., Groenewoud, S., & Jeurissen, P. (2018). Do private hospitals outperform public hospitals regarding efficiency, accessibility, and quality of care in the European Union? A literature review. *The International journal of health planning and management*, 33(2), e434–e453. <https://doi.org/10.1002/hpm.2502>
