# Supplementary material for: Outcomes for surgical procedures funded by the English health service but carried out in public versus independent hospitals: a database study
Source: BMJ Qual Saf. 2021 Sep 7;31(7):515–25. doi: 10.1136/bmjqs-2021-013522 (PMC9234423; doi:10.1136/bmjqs-2021-013522)
Supplement: Supplementary data [file bmjqs-2021-013522supp003.pdf]

**Supplementary Table 2: List of operations occurring at least 4000 times in both ISHPs and NHS hospitals between 01/04/2001 and 31/12/2019**

| OPCS code and name                                                                                                            |
|-------------------------------------------------------------------------------------------------------------------------------|
| A521 - Therapeutic lumbar epidural injection                                                                                  |
| A522 - Therapeutic sacral epidural injection                                                                                  |
| A528 - Other specified therapeutic epidural injection                                                                         |
| A573 - Radiofrequency controlled thermal destruction of spinal nerve root                                                     |
| A577 - Injection of therapeutic substance around spinal nerve root                                                            |
| A604 - Radiofrequency controlled thermal destruction of peripheral nerve                                                      |
| A611 - Excision of lesion of peripheral nerve                                                                                 |
| A651 - Carpal tunnel release                                                                                                  |
| A671 - Cubital tunnel release                                                                                                 |
| A735 - Injection of therapeutic substance around peripheral nerve                                                             |
| C121 - Excision of lesion of eyelid NEC                                                                                       |
| C712 - Phacoemulsification of lens                                                                                            |
| C733 - Capsulotomy of posterior lens capsule                                                                                  |
| C751 - Insertion of prosthetic replacement for lens NEC                                                                       |
| C794 - Injection into vitreous body NEC                                                                                       |
| C873 - Tomography evaluation of retina                                                                                        |
| D021 - Excision of lesion of external ear                                                                                     |
| D151 - Myringotomy with insertion of ventilation tube through tympanic membrane                                               |
| E036 - Septoplasty of nose NEC                                                                                                |
| E081 - Polypectomy of internal nose                                                                                           |
| E091 - Excision of lesion of external nose                                                                                    |
| E142 - Intranasal ethmoidectomy                                                                                               |
| F091 - Surgical removal of impacted wisdom tooth                                                                              |
| F093 - Surgical removal of wisdom tooth NEC                                                                                   |
| F094 - Surgical removal of tooth NEC                                                                                          |
| F095 - Surgical removal of retained root of tooth                                                                             |
| F104 - Extraction of multiple teeth NEC                                                                                       |
| F109 - Unspecified simple extraction of tooth                                                                                 |
| F341 - Bilateral dissection tonsillectomy                                                                                     |
| G451 - Fibreoptic endoscopic examination of upper gastrointestinal tract and biopsy of lesion of upper gastrointestinal tract |
| G458 - Other specified diagnostic fibreoptic endoscopic examination of upper gastrointestinal tract                           |
| G459 - Unspecified diagnostic fibreoptic endoscopic examination of upper gastrointestinal tract                               |
| H201 - Fibreoptic endoscopic snare resection of lesion of colon                                                               |
| H202 - Fibreoptic endoscopic cauterisation of lesion of colon                                                                 |
| H206 - Fibreoptic endoscopic resection of lesion of colon NEC                                                                 |
| H221 - Diagnostic fibreoptic endoscopic examination of colon and biopsy of lesion of colon                                    |
| H229 - Unspecified diagnostic endoscopic examination of colon                                                                 |
| H231 - Endoscopic snare resection of lesion of lower bowel using fibreoptic sigmoidoscope                                     |
| H251 - Diagnostic endoscopic examination of lower bowel and biopsy of lesion of lower bowel using fibreoptic sigmoidoscope    |
| H259 - Unspecified diagnostic endoscopic examination of lower bowel using fibreoptic sigmoidoscope                            |
| H482 - Excision of skin tag of anus                                                                                           |
| H511 - Haemorrhoidectomy                                                                                                      |
| H523 - Injection of sclerosing substance into haemorrhoid                                                                     |
| H524 - Rubber band ligation of haemorrhoid                                                                                    |
| H568 - Other specified other operations on anus                                                                               |
| J183 - Total cholecystectomy NEC                                                                                              |
| L703 - Ligation of artery NEC                                                                                                 |
| L841 - Combined operations on primary long saphenous vein                                                                     |
| L882 - Radiofrequency ablation of varicose vein of leg                                                                        |
| M451 - Diagnostic endoscopic examination of bladder and biopsy of lesion of bladder NEC                                       |
| M459 - Unspecified diagnostic endoscopic examination of bladder                                                               |
| M473 - Removal of urethral catheter from bladder                                                                              |
| M494 - Introduction of therapeutic substance into bladder                                                                     |
| M653 - Endoscopic resection of prostate NEC                                                                                   |
| M764 - Endoscopic dilation of urethra                                                                                         |
| M792 - Dilation of urethra NEC                                                                                                |

N153 - Excision of lesion of epididymis  
N171 - Bilateral vasectomy  
N303 - Circumcision  
O291 - Subacromial decompression  
P054 - Excision of lesion of vulva NEC  
P231 - Anterior and posterior colporrhaphy NEC  
P232 - Anterior colporrhaphy NEC  
P233 - Posterior colporrhaphy NEC  
Q023 - Cauterisation of lesion of cervix uteri  
Q074 - Total abdominal hysterectomy NEC  
Q075 - Subtotal abdominal hysterectomy  
Q089 - Unspecified vaginal excision of uterus  
Q111 - Vacuum aspiration of products of conception from uterus NEC  
Q121 - Introduction of intrauterine contraceptive device  
Q165 - Radiofrequency ablation of endometrium  
Q171 - Endoscopic resection of lesion of uterus  
Q181 - Diagnostic endoscopic examination of uterus and biopsy of lesion of uterus  
Q188 - Other specified diagnostic endoscopic examination of uterus  
Q189 - Unspecified diagnostic endoscopic examination of uterus  
Q491 - Endoscopic extirpation of lesion of ovary NEC  
S065 - Excision of lesion of skin of head or neck NEC  
S068 - Other specified other excision of lesion of skin  
S069 - Unspecified other excision of lesion of skin  
T202 - Primary repair of inguinal hernia using insert of prosthetic material  
T209 - Unspecified primary repair of inguinal hernia  
T212 - Repair of recurrent inguinal hernia using insert of prosthetic material  
T242 - Repair of umbilical hernia using insert of prosthetic material  
T243 - Repair of umbilical hernia using sutures  
T252 - Primary repair of incisional hernia using insert of prosthetic material  
T272 - Repair of ventral hernia using insert of prosthetic material  
T273 - Repair of ventral hernia using sutures  
T422 - Endoscopic destruction of lesion of peritoneum  
T423 - Endoscopic division of adhesions of peritoneum  
T439 - Unspecified diagnostic endoscopic examination of peritoneum  
T521 - Palmar fasciectomy  
T525 - Digital fasciectomy  
T578 - Other specified other operations on fascia  
T591 - Excision of ganglion of wrist  
T592 - Excision of ganglion of hand NEC  
T594 - Excision of ganglion of foot  
T625 - Injection into bursa  
T691 - Primary tenolysis  
T723 - Release of constriction of sheath of tendon  
T744 - Injection of therapeutic substance into tendon NEC  
T791 - Plastic repair of rotator cuff of shoulder NEC  
T962 - Excision of lesion of soft tissue NEC  
V254 - Primary posterior laminectomy decompression of lumbar spine  
V255 - Primary posterior decompression of lumbar spine NEC  
V337 - Primary microdiscectomy of lumbar intervertebral disc  
V485 - Radiofrequency controlled thermal denervation of spinal facet joint of lumbar vertebra  
V544 - Injection around spinal facet of spine  
W068 - Other specified total excision of bone  
W082 - Excision of overgrowth of bone  
W083 - Excision of excrescence of bone  
W085 - Partial excision of bone NEC  
W132 - Displacement osteotomy  
W153 - Osteotomy of first metatarsal bone NEC  
W157 - Osteotomy of bone of foot and fixation HFQ  
W283 - Removal of internal fixation from bone NEC  
W371 - Primary total prosthetic replacement of hip joint using cement  
W381 - Primary total prosthetic replacement of hip joint not using cement  
W391 - Primary total prosthetic replacement of hip joint NEC  
W401 - Primary total prosthetic replacement of knee joint using cement

W411 - Primary total prosthetic replacement of knee joint not using cement  
W421 - Primary total prosthetic replacement of knee joint NEC  
W572 - Primary excision arthroplasty of joint NEC  
W581 - Primary resurfacing arthroplasty of joint  
W593 - Fusion of first metatarsophalangeal joint NEC  
W595 - Fusion of interphalangeal joint of toe NEC  
W621 - Primary arthrodesis and internal fixation of joint NEC  
W712 - Open excision of intra-articular osteophyte  
W742 - Reconstruction of intra-articular ligament NEC  
W781 - Release of contracture of shoulder joint  
W791 - Soft tissue correction of hallux valgus  
W802 - Open debridement of joint NEC  
W822 - Endoscopic resection of semilunar cartilage NEC  
W833 - Endoscopic shaving of articular cartilage  
W836 - Endoscopic excision of articular cartilage NEC  
W851 - Endoscopic removal of loose body from knee joint  
W858 - Other specified therapeutic endoscopic operations on cavity of knee joint  
W879 - Unspecified diagnostic endoscopic examination of knee joint  
W891 - Endoscopic chondroplasty NEC  
W901 - Aspiration of joint  
W902 - Arthrography  
W903 - Injection of therapeutic substance into joint  
W904 - Injection into joint NEC  
W913 - Manipulation of prosthetic joint NEC  
W919 - Unspecified other manipulation of joint  
W931 - Primary hybrid prosthetic replacement of hip joint using cemented acetabular component  
W941 - Primary hybrid prosthetic replacement of hip joint using cemented femoral component  
X292 - Continuous intravenous infusion of therapeutic substance NEC  
X362 - Venesection  
X375 - Intramuscular injection for local action  
X921 - Cytokine inhibitor drugs Band 1

---
